1 Pervasive *Listeria monocytogenes* are common  
2 in Norwegian food chains and associated with  
3 increased prevalence of stress survival and  
4 resistance determinants

5 Annette Fagerlund<sup>a#</sup>, Eva Wagner<sup>a\*</sup>, Trond Møretrø<sup>a</sup>, Even Heir<sup>a</sup>, Birgitte Moen<sup>a</sup>, Kathrin Rychli<sup>b</sup>,  
6 Solveig Langsrud<sup>a</sup>

7 <sup>a</sup> Nofima - Norwegian Institute of Food, Fisheries and Aquaculture Research, Ås, Norway

8 <sup>b</sup> Unit for Food Microbiology, Institute for Food Safety, Food Technology and Veterinary Public  
9 Health, University of Veterinary Medicine, Vienna, Austria

10 \*current address: Institute of Food Science, University of Natural Resources and Life Science,  
11 Vienna, Austria

12 # Corresponding author: Annette Fagerlund, [annette.fagerlund@nofima.no](mailto:annette.fagerlund@nofima.no)

13 Keywords: *Listeria*; *L. monocytogenes*; *Listeria monocytogenes*; whole genome sequencing;  
14 WGS; food processing environment; food safety; meat industry; salmon industry; meat  
15 processing; salmon processing; plasmids; stress resistance; stress survival; antibiotic resistance;  
16 persistence; pervasive; pervasion; *inlA*

17 Running title: Pervasive *L. monocytogenes* in Norwegian food industry

## 18 Abstract

19 To investigate the diversity, distribution, persistence, and stress resistome of *Listeria*  
20 *monocytogenes* clones dominating in food processing environments in Norway, genome  
21 sequences from 769 *L. monocytogenes* isolates from food industry environments, foods, and  
22 raw materials (of which 512 were sequenced in the present study) were subjected to wgMLST,  
23 SNP, and comparative genomic analyses. The dataset comprised isolates from nine meat and six  
24 salmon processing facilities in Norway collected over a period of three decades. The most  
25 prevalent clonal complex (CC) was CC121, found in ten factories, followed by CC7, CC8, and CC9,  
26 found in seven factories each. Overall, 72% of the isolates were classified as persistent, showing  
27 20 or fewer wgMLST allelic differences towards an isolate found in the same factory in a  
28 different calendar year. Moreover, over half of the isolates (56%) showed this level of genetic  
29 similarity towards an isolate collected from a different food processing facility. These were  
30 designated as pervasive strains, defined as clusters with the same level of genetic similarity as  
31 persistent strains but isolated from different factories. The prevalence of genetic determinants  
32 associated with increased survival in food processing environments, including heavy metal and  
33 biocide resistance determinants, stress response genes and *inlA* truncation mutations, showed a  
34 highly significant increase among pervasive isolates, but not among persistent isolates.  
35 Furthermore, these genes were significantly more prevalent among the isolates from food  
36 processing environments compared to in isolates from natural and rural environments (n=218)  
37 and clinical isolates (n=111) from Norway.

## 38 Importance

39 *Listeria monocytogenes* can persist in food processing environments for months to decades and  
40 spread through food chains by e.g., contaminated raw materials. Knowledge about the  
41 distribution and diversity of *L. monocytogenes* is of importance in outbreak investigations and  
42 essential to effectively track and control this pathogen in the food chain. The current study  
43 presents a comprehensive overview of the prevalence of persistent clones and of the diversity  
44 of *L. monocytogenes* in Norwegian food processing facilities. The results demonstrate extensive  
45 spread of highly similar strains throughout Norwegian food chains, in that 56% of the 769  
46 collected isolates from food processing factories belonged to clusters of *L. monocytogenes*  
47 identified in more than one facility. These strains were associated with an overall increase in the  
48 prevalence of plasmids and determinants of heavy metal and biocide resistance as well as other  
49 genetic elements associated with stress survival mechanisms and persistence.

## 50 Introduction

51 *Listeria monocytogenes* is a foodborne pathogen responsible for the deadly disease listeriosis.  
52 Cross-contamination of food products with *L. monocytogenes* during processing is a major  
53 concern, especially with regard to ready-to-eat (RTE) products that support growth of the  
54 pathogen prior to consumption. As the pathogen is widespread in natural and urban  
55 environments (1, 2) and able to form biofilms and withstand various stresses such as  
56 disinfection agents, high and low pH, and low temperatures (3, 4), it is very difficult to eliminate  
57 *L. monocytogenes* from food processing environments. Clonal populations of *L. monocytogenes*  
58 that survive in the processing environment over an extended time-period (months or years) are  
59 referred to as persistent *L. monocytogenes*. In contrast, transient *L. monocytogenes* enter the  
60 processing environment but are eliminated through cleaning and disinfection (5, 6). Some  
61 authors also define a category of “persistent transient” *L. monocytogenes* contamination which  
62 is a consequence of continual introduction of one or more subtypes into the processing  
63 environment from outside reservoirs combined with a failure to apply sufficient *Listeria* control  
64 measures (7). The concept of pervasive bacterial strains is sometimes used to describe  
65 subpopulations of bacteria with enhanced ability to spread or migrate to new geographical  
66 locations or ecological habitats (8, 9). This term has not previously been used to describe  
67 subpopulations of *L. monocytogenes*, although the dissemination of persistent strains to more  
68 than one food processing facility is a well-documented phenomenon (10-18).

69 In a phylogenetic context, *L. monocytogenes* comprises four separate deep-branching lineages,  
70 which are further subdivided into sequence types (STs) and clonal complexes (CCs or clones) by  
71 multilocus sequence typing (MLST) (19). Certain clones such as CC1 and CC4 belonging to

72 lineage I are commonly associated with clinical disease while others, often belonging to lineage  
73 II (e.g., CC9, CC121), are frequently found in food processing environments and food, but rarely  
74 among clinical cases (19-21). The underlying causes behind these differences are not fully  
75 understood, but thought to be linked to differences in virulence potential and the ability to  
76 survive and multiply in food processing environments (11, 22-29). An increased capacity for  
77 biofilm formation can contribute to the survival and persistence of *L. monocytogenes* in both  
78 natural and food processing environments (3, 30-32). Resistance to stressors encountered in  
79 food processing environments, e.g., biocides and alkaline pH, may also contribute to survival.  
80 Associated stress resistance determinants can be spread through mobile genetic elements such  
81 as plasmids, prophages and transposons (21, 33-37). For example, it has been shown that the  
82 presence of *bcrABC* or *qacH* (located on plasmids and transposon Tn6188, respectively) results  
83 in tolerance to low concentrations of quaternary ammonium compounds (QAC), biocides  
84 commonly used in the food industry (26, 36, 38-40). Another genetic determinant associated  
85 with CCs commonly found in food processing plants is premature stop codon (PMSC) truncation  
86 mutations in *inlA* encoding the virulence factor internalin A (41, 42). Although the ecological  
87 significance of *inlA* PMSC mutations is not fully understood, some studies indicate that they  
88 mediate increased adhesion and biofilm formation (43-45) and increased tolerance to  
89 desiccation (27).

90 There is a consensus that certain *L. monocytogenes* strains are more frequently isolated from  
91 food processing factories because of their increased ability to survive and multiply in niches that  
92 are difficult to keep clean (2, 7, 28, 46). However, there is no consensus on the operational  
93 definition of a persistent strain in terms of the number of independent isolation events or the

94 time-frame (7, 28). Furthermore, the level of genetic relatedness required to delineate a  
95 persistent clone is defined by the resolution of the employed molecular subtyping technique,  
96 and with increased sensitivity of subtyping methods, the criteria for defining persistent clones  
97 have to be reconsidered. Persistent strains are indistinguishable when characterized with  
98 traditional subtyping techniques such as multi locus variable-number tandem repeat analysis  
99 (MLVA) and pulsed-field gel electrophoresis (PFGE). These methods have limited resolution as  
100 they capture genetic diversity in a small portion of the microbial genome. In contrast, whole  
101 genome sequencing (WGS)-based typing strategies determine the diversity across the entire  
102 genome and can accurately define genetic distances and differentiate between closely related  
103 strains (47, 48). Therefore, WGS-based analysis usually implies setting a threshold of genetic  
104 relatedness for identification of clusters or “strains” from the same contamination source. This  
105 threshold commonly constitutes 7 to 10 core genome MLST (cgMLST) differences (19, 49, 50),  
106 20 single nucleotide polymorphisms (SNPs)(51, 52), or 20 whole genome MLST (wgMLST)  
107 differences, as SNP and wgMLST analyses have similar resolution (10, 53, 54). However, these  
108 thresholds must be used with caution as bacteria continuously diversify through evolutionary  
109 processes. Different outbreak strains and persistent strains will therefore show varying levels of  
110 genetic relatedness (47, 53, 55).

111 Interpretation of WGS-based typing results should also consider that highly similar isolates may  
112 be found across several food processing facilities (10-18). This may occur due to contamination  
113 from a common source of raw materials or pre-processed product (e.g., slaughtered salmon) or  
114 through transfer of used processing equipment between food processing plants. In addition,  
115 evidence suggests that highly similar *L. monocytogenes* strains may be present in apparently

116 unassociated locations, at least in natural environments (2). However, there is limited  
117 knowledge regarding the extent to which highly similar genetic clones disseminate or pervade  
118 and establish in multiple separate locations. In case of public investigations of listeriosis  
119 outbreaks, it is of importance both for public health authorities and for food industry  
120 representatives to know more about the prevalence of pervasive strains.

121 The present study aimed to investigate the diversity, distribution, persistence, and stress  
122 resistome of *L. monocytogenes* clones dominating in food processing environments in Norway.  
123 The analysis comprises 769 *L. monocytogenes* isolates collected during 1990-2020, including 257  
124 *L. monocytogenes* belonging to ST8 and ST9 subjected to WGS analysis as part of earlier studies  
125 (10, 11). The aims of the study were to (i) assess the genomic diversity of *L. monocytogenes* in  
126 Norwegian food chains, (ii) identify persistence, contamination routes, and cases where the  
127 same strain is present in more than one factory, (iii) evaluate these aspects in light of the  
128 presence of genetic determinants associated with stress survival, antimicrobial resistance and  
129 persistence, and (iv) compare the prevalence of genetic determinants of stress survival in the  
130 isolates from food processing with that found in Norwegian clinical isolates and environmental  
131 isolates from urban and natural locations (2, 56).

## 132 Results

### 133 Diversity of isolates from the Norwegian food chain

134 The basis of the current study was a collection of 769 *L. monocytogenes* isolates from the  
135 Norwegian food industry from 1990 to 2020 (see Table S1 in the supplemental material). Of  
136 these, 441 were from meat processing factories, 19 were from zones with lower hygienic

137 conditions associated with meat processing (i.e., animal transport vehicles, animal holding pens,  
138 and slaughter departments), and 306 isolates were from salmon processing factories. Samples  
139 were mainly from the processing environment (floors, drains, and or food processing  
140 equipment) and to a minor degree (n=12) from raw materials and products. All were collected  
141 from nine different meat production plants and six different salmon processing plants (Table  
142 S2), except for eight isolates from other factories and three isolates from other food associated  
143 sources (salmon and cheese product, domestic kitchen). A subset of the isolates belonging to *L.*  
144 *monocytogenes* ST8 and ST9 (5 and 252 isolates, respectively) were previously subjected to  
145 WGS analysis as part of earlier studies (10, 11). The additional 512 isolates were subjected to  
146 WGS, *in silico* MLST, and wgMLST profiling. MLST showed that 13% of the 769 studied isolates  
147 belonged to lineage I and the remaining isolates to lineage II, while lineage III or IV isolates were  
148 not detected. The isolates were assigned to 33 different STs and 28 different CCs (Fig. 1).

149 Genetic distances obtained from wgMLST analysis were compared with results obtained from a  
150 SNP analysis performed separately for each CC using the CFSAN SNP pipeline (57), with  
151 reference genomes selected from each CC. The average number of SNPs and wgMLST loci  
152 detected within each CC was 126 and 140, respectively. The results show that with default  
153 filtering settings, wgMLST analysis was somewhat more sensitive than SNP analysis (Table 1).

#### 154 **Presence of plasmids and genetic determinants of stress response and resistance**

155 A BLAST analysis was carried out to detect plasmids and genetic determinants associated with  
156 stress survival and antimicrobial resistance. Overall, plasmids were identified in 58% of the  
157 *L. monocytogenes* isolates. All were *repA*-family theta-replicating plasmids belonging to either  
158 group 1 (G1) or group 2 (G2) (58), with one exception. Isolate MF6196 belonging to CC7



159 harbored a novel RepA group protein, hereby named RepA group 12 (G12), which was 76%  
160 identical to RepA G2 (Table 2). In total, 39% of the isolates harbored *repA* G1 plasmids while  
161 18% harbored *repA* G2 plasmids (Table S3). In addition, both G1 and G2 *repA* genes were  
162 identified in ten CC5 isolates collected in factory M6 between 2016 and 2019, indicating that  
163 they harbored two plasmids. These isolates were related (13-45 wgMLST differences) to three  
164 CC5 isolates containing *repA* G1 but not *repA* G2, collected in the same factory during 2010 and  
165 2012, suggesting that this strain had acquired a second plasmid harboring a *repA* G2 gene  
166 during the intervening years.

167 The search for genetic determinants associated with stress survival, resistance, and persistence  
168 identified 76 core genes that were present in all genomes, and 20 accessory genes, gene loci or  
169 gene variants that were present in a subset of genomes (Fig. 2A and Table S4). The only  
170 identified antibiotic resistance gene, detected by searching the ResFinder database (59), was  
171 the fosfomycin resistance gene (*lmo1702*, *fosX\_2*) (60), present in all genomes. The accessory  
172 genetic determinants comprised cadmium resistance (*cadA1C1*, *cadA2C2*, *cadA4C4*, *cadA5C5*)  
173 and arsenic resistance operons (*arsA1D1R1D2R2A2B1B2* on *Listeria* Genomic Island 2 (LGI2) and  
174 *arsCBADR* on a Tn554-like transposon) (61), QAC resistance loci (chromosomally encoded *qacH*  
175 and plasmid encoded *bcrABC* (40, 62)), various additional plasmid-associated stress response  
176 genes (*clpL*, *mco*, *npr*, a *gbuC*-like gene, a NiCo riboswitch, and *tmr* (63)), genes located on the  
177 stress survival islets (SSIs) SSI-1 and SSI-2 (64, 65), biofilm associated genes (*bapL* and *inlL* (66,  
178 67)), and PMSC and internal deletion mutations in *inlA* and *inlB* (45). Further details regarding  
179 the identified accessory loci found in food environmental isolates are presented in Text S1 in the

180 supplemental material and Table 2. The unique combinations of accessory genes are presented  
181 in Fig. 2A and the complete phylogeny is shown in Fig. S1.

182 For statistical analyses, the accessory stress survival genes were grouped into categories of  
183 cadmium resistance, arsenic resistance, QAC resistance, stress survival islets, biofilm-associated  
184 genes, and *inlA* PMSC mutations (the identified *inlA* 3-codon deletion (3CD) *inlA* mutation  
185 associated with an increased Caco-2 cell invasion phenotype (68, 69) was not included in this  
186 category) (Fig. 2B). The prevalence of plasmids and all tested categories of stress survival genes  
187 was significantly higher in isolates from hygienic zones in meat processing factories than in  
188 salmon processing environments and in low-hygienic zones associated with meat production  
189 ( $p < 0.007$ ; Table S5). However, it should be emphasized that the high prevalence among isolates  
190 from meat processing was associated with their high prevalence within CC9 isolates, which  
191 constituted the majority of isolates in this category ( $n = 286$ ; 65%). When CC9 isolates were  
192 excluded from the analysis, the occurrence of cadmium and arsenic resistance loci was  
193 significantly higher in isolates from salmon processing environments than from hygienic zones in  
194 meat processing factories ( $p \leq 0.001$ ). In contrast, the occurrence of biofilm-associated genes was  
195 significantly higher in isolates from hygienic zones in meat processing factories than from  
196 salmon processing environments ( $p = 0.001$ ) and low-hygienic zones associated with meat  
197 production ( $p = 0.02$ ) (Fig. 2B and Table S5).

#### 198 Proportion of food processing plants harbouring the different CCs

199 As the numbers of sequenced isolates from each plant varied widely, ranging from 4 to 192 for  
200 the meat processing plants and from 2 to 188 for the salmon processing plants (Table S2), the  
201 number of processing plants in which each CC was detected was summarized to assess the

202 prevalence of different CCs (Fig. 3). Prevalence was not counted as raw number of isolates to  
203 reduce bias due to differing number of isolates included from each plant. The clone detected in  
204 the greatest number of processing plants overall was CC121 (found in 6/9 meat factories and  
205 4/6 salmon factories), followed by CC7, CC8, and CC9. CC9 was detected in the largest number  
206 of meat processing plants (7/9).

### 207 Closely related isolates were present over time within individual factories

208 We next investigated whether persistence of specific strains of *L. monocytogenes* occurred in  
209 processing plants, and whether this was associated with certain CCs or the presence of plasmids  
210 or stress survival genes. In total, 551 isolates (72%), belonging to 15 different CCs, were linked  
211 to persistence. The proportion of persistent isolates was significantly higher in lineage II (74%)  
212 than in lineage I (53%) ( $p < 0.001$ ). A persistent isolate was here defined as an isolate that  
213 showed 20 or fewer wgMLST allelic differences towards an isolate collected from the same  
214 factory in a different calendar year. A persistent strain was defined as a clonal population  
215 showing this level of similarity towards at least one other isolate in a cluster found across more  
216 than one calendar year in the same factory. The definition of persistence is irrespective of  
217 whether the isolates originated from e.g., an established house strain, reintroduction from raw  
218 materials or external environment, or from house strains present at a supplier's factory. Clonal  
219 clusters of isolates collected within the same calendar year and thus not designated as  
220 persistent included 23 isolates belonging to CC3 (0-8 wgMLST differences) collected from  
221 factory S6 between January and April of 2020, and 55 CC9 isolates collected during an eight-  
222 week period in 2014 at factory M4 in connection with the previously described event related to  
223 installation of a contaminated second-hand slicer line (10).

224 Analysis of the prevalence of the examined categories of genes associated with stress survival  
225 showed that QAC resistance genes and biofilm associated genes were more prevalent among  
226 persistent than non-persistent strains ( $p=0.02$  and  $p=0.04$ , respectively) (Fig. 4A and Table S6).  
227 No significant differences were identified between persistent or non-persistent isolates with  
228 respect to the presence of plasmids, cadmium and arsenic resistance gene, stress survival islets,  
229 or *inlA* PMCS mutations.

230 Previous studies show that the most common sites contaminated with persistent *Listeria* were  
231 floors, drains, conveyor belts, slicers, and tables (7). Factories and typical niches where  
232 persistent *L. monocytogenes* strains were found are summarized in Table 3, showing that these  
233 were largely consistent with previous studies, although isolation of persistent strains on  
234 conveyors was only observed in salmon processing plants. In addition, salmon gutting machines  
235 were identified as common sites for isolation. The results furthermore show that many different  
236 CCs can be associated with persistence. However, some appear to have a greater tendency than  
237 others for becoming persistent, e.g., CC7 and CC8, each identified as persistent in four factories,  
238 and CC9 and CC121, each in three factories.

239 From the salmon slaughterhouses (S1-S6), persistent strains were identified in ten CCs (11 STs;  
240 Table 3). Six of these CCs were present among isolates repeatedly found in S6, where the  
241 greatest number of isolates of the same persistent CC121 strain (n=59) was obtained through  
242 sampling in the period from February 2019 to April 2020. The emergence of CC121 was followed  
243 by extensive sampling in S6 in this period and the CC121 strain was detected in the  
244 slaughterhouse processing equipment, machines and environment. Interestingly, the CC121  
245 strain was also found onboard a salmon slaughter ship supplying S6 with fresh salmon for

246 further processing and on samples from fresh salmon. This indicated that fresh slaughtered  
247 salmon contaminated with *L. monocytogenes* was a likely source for the introduction and  
248 subsequent persistence of this particular CC121 strain in the plant. Salmon slaughtered in other  
249 slaughterhouses and further processed in factory S2 was likely the source of a persistent CC1  
250 strain repeatedly and extensively isolated in samples from production environment and  
251 equipment in S2 over a two-year period: In a cluster of 30 isolates differing by 0-16 wgMLST  
252 alleles, eight isolates were obtained from samples of supplied slaughtered salmon. For salmon  
253 processing plant S1, we previously reported isolation of the same CC8 strain ten years apart  
254 (11). This factory also harbored a persistent strain of CC7 that was repeatedly isolated from the  
255 processing environment and equipment throughout a three-year sampling period. A similar  
256 situation was observed in factory S5, with repeated isolation of a CC177 strain over a two-year  
257 sampling period. In factory S2, clonal ST732 isolates (CC7) sampled eight years apart (2011-  
258 2019) were isolated from various surfaces of equipment and processing environments. These  
259 observations indicate that *L. monocytogenes* strains had persisted in the respective  
260 slaughterhouses or were repeatedly reintroduced between sampling events during the study  
261 period.

262 For the meat processing plants, repeated isolation of the same strain over at least two different  
263 years was observed for nine CCs (Table 3). The dominance and persistence of CC9/ST9 over  
264 several years in meat processing plants M1 and M4 was previously described (10). In the  
265 present study, persistence of a CC9 strain over a two-year period was also confirmed in factory  
266 M8. For factory M1, the CC9 strains were repeatedly isolated from the department producing  
267 heat-treated products (10), while in raw meat departments, persistent strains were identified

268 for CC8, CC19, CC91 and CC415. Closely related isolates of CC19 and CC415 were also repeatedly  
269 isolated in factory M4, but in contrast to M1, only in the heat-treated department. Persistent  
270 CC7 strains were isolated from floors in poultry processing plants M2 and M6. CC7 was the  
271 dominant clonal group in M2, and the only CC from which the same strain was repeatedly  
272 isolated in this factory. In factory M6, a persistent strain of CC5 was repeatedly isolated in 2012  
273 and during 2016-2019 from floors in a room used for processing of heat-treated products.  
274 Closely related CC199 was isolated three times over an eight-month period from factory M8.  
275 Two different clusters of CC121 isolates were identified in drains in factory M4, one consisting  
276 of two isolates collected three years apart and differing by six wgMLST alleles, and another  
277 comprising six isolates differing by 0-6 wgMLST alleles, collected over a period of four years. A  
278 cluster of CC121 was also detected in different sites in factory M6, comprising six isolates  
279 differing by 3-23 wgMLST alleles over a two-year period. Thus, for several CCs, including CC7,  
280 CC9, CC19 and CC121, persistent strains were repeatedly isolated from more than one meat  
281 processing factory, while some CCs (e.g., CC5, CC199) were repeatedly isolated only at single  
282 plants.

### 283 **Pervasive strains: The same strain found in more than one food processing plant**

284 Phylogenetic analysis revealed that many isolates were closely related despite being isolated  
285 from different processing plants (Fig. 1). We hereby designate the observation of clonal  
286 populations of *L. monocytogenes* found in more than one factory as pervasion. The definition  
287 does not differentiate between the mode of dissemination between factories and includes  
288 isolates with a common source and ancestor. In total, 433 of the isolates (56%) were pervasive,  
289 showing 20 or fewer wgMLST allelic differences towards an isolate found in a different factory.

290 A pervasive strain was defined as the isolates belonging to such a cluster. The proportion of  
291 pervasive isolates differed between food source, with 70% of isolates from meat processing  
292 environments designated as pervasive, in contrast to only 40 % of isolates from salmon  
293 processing industry. The proportion of pervasive isolates was significantly higher in lineage II  
294 (59%) than in lineage I (34%) ( $p < 0.001$ ).

295 With two exceptions, pervasive strains were either shared between meat processing factories or  
296 between salmon processing factories (Fig. 5A and 5B). Both exceptions involved salmon factory  
297 S1. The first case involved CC7 and a cluster of 14 isolates collected at S1 between 2011 and  
298 2014 and a cluster of 14 isolates from meat factory M6 collected in 2004 and 2011, differing by  
299 15-47 allelic differences (median 22). In the second case, a CC8 isolate from a floor sample in  
300 the raw meat zone in factory M1 collected in 2019 differed by 11-17 wgMLST alleles to a cluster  
301 of five isolates from S1, one from 2001 and four from 2011.

302 Factories S2 and S6 were the two most heavily sampled salmon slaughterhouses. The two  
303 factories are located in different geographic regions in Norway and belong to different  
304 companies. WGS was performed for 68 isolates collected during 2011-2012 and 2018-2019 from  
305 S2, and for 188 isolates collected between June 2017 and April 2020 from S6. We identified  
306 three different CCs (CC1, CC121, and CC88) in which closely related isolates ( $\leq 17$  wgMLST allelic  
307 differences) were found in both factories. In the case of CC1, one isolate from a product sample  
308 collected in October 2019 from factory S6 (MF7739) differed by 7-15 wgMLST alleles from the  
309 previously mentioned persistent strain comprising 30 environmental isolates from factory S2,  
310 for which the likely source was slaughtered salmon. These were obtained between July 2018  
311 and May 2019. Also, one CC121 isolate collected from a drain at factory S2 in 2012 (MF4804)

312 showed 5-11 wgMLST allelic differences towards the previously mentioned cluster of 59  
313 persistent CC121 isolates collected in factory S6 during 2019-2020, which included one isolate  
314 collected onboard the slaughter ship. However, the slaughter ship had not been in operation in  
315 2012 when the S2 isolate was detected. The third case linking these two factories were two  
316 isolates separated by 17 wgMLST alleles belonging to CC88, obtained from the boots of a factory  
317 worker at S2 in November 2018 and from salmon from an external supplier at factory S6 one  
318 year later, in November 2019. Genetically similar isolates were also found at factories S2 and S3,  
319 where two CC14 isolates collected in S2 in 2011-2012 showed 12-28 wgMLST allelic differences  
320 towards a cluster of 13 isolates from S3 collected during 2018-2019.

321 In the meat industry, the majority of isolates from pervasive strains belonged to CC9, for which  
322 we previously described a close genetic relationship between *L. monocytogenes* from four meat  
323 processing plants (M1, M4, M5 and M7) collected during 2009-2017 (10). In the current study,  
324 38 additional CC9 isolates, including representatives from three additional processing plants  
325 (M3, M8, and M9) were sequenced (Fig. 5C). Of particular interest was a group of CC9 isolates  
326 collected in 1998 and 2001 from the raw side of a meat factory (M3) that is no longer in  
327 operation (70). One of the isolates from 1998 differed by only 5-8 wgMLST allelic differences to  
328 isolates from five other processing plants (M1, M4, M5, M7, and M8), suggesting that this CC9  
329 strain has circulated in Norwegian meat chains for at least two decades.

### 330 Pervasion was significantly associated with presence of stress survival genes

331 In contrast to persistent strains (Fig. 4A), isolates identified as pervaders showed significantly  
332 increased prevalence of plasmids and all examined categories of stress and persistence  
333 associated genes ( $p < 0.001$ ) (Fig. 4B and Table S6). The prevalence of individual gene variants



334 (*clpL*, *cadA1C1*, *cadA2C2*, *bcrABC*, *qacH*, the *ars* operon on LGI2, *arsCBADR* on Tn554, SSI-1, SSI-  
335 2, *bapL*, and *inlL*) was also significantly higher in isolates classified as pervaders compared to  
336 non-pervaders ( $p \leq 0.004$ ) (Table S6).

337 Of the pervasive isolates, 81% (351/433) were also persistent. The 82 pervaders classified as  
338 non-persistent (11% of the total number of isolates) included the 55 CC9 isolates associated  
339 with the previously described contaminated second-hand slicer line collected from factory M4  
340 during an eight-week period in 2014 (10). Only 63% (351/551) of the persistent isolates were  
341 also pervaders. If the CC9 isolates were excluded from the analysis, 92% of pervaders were also  
342 persistent, only 51% of persistent isolates were also pervasive, and only 3% of pervasive isolates  
343 were classified as non-persistent.

#### 344 [Stress survival determinants in clinical and environmental isolates](#)

345 To compare the prevalence of plasmids and stress survival genes in isolates from food  
346 processing environments to human clinical isolates and isolates from natural environments in  
347 Norway, the BLAST analysis was also performed for the genomes of 111 Norwegian clinical  
348 isolates and 218 isolates from rural, urban, and farm environments in Norway, which were  
349 examined in a recent study (2). The prevalence of plasmids was significantly different between  
350 isolates from the three sources ( $p < 0.001$ ; Table S7), with 26% and 8% of clinical and  
351 environmental isolates harbouring plasmids, respectively, compared to 41% for the isolates  
352 from food processing environments (Table S3). The lowest prevalence of plasmids was found in  
353 the 87 isolates from dairy farms (5%). In addition to *repA* G1 and *repA* G2 plasmids, one *repA*  
354 group 4 (G4) plasmid and two small non-*repA* plasmids were identified among the clinical  
355 isolates (Table 2 and Text S1).

356 The clinical and natural environment isolates harboured the same core and accessory stress  
357 genes as the isolates from food processing environments with three exceptions: i) one clinical  
358 isolate harboured a chromosomally encoded *tet(M)* tetracycline resistance gene, identified  
359 through search against the ResFinder database (59), ii) one clinical isolate belonging to CC7  
360 harboured the *emrC* gene conferring QAC resistance (71), and iii) none of the isolates harboured  
361 internal deletion mutations in *inlB*. All unique combinations of the accessory gene subset for  
362 clinical and environmental isolates are presented in Fig. 6A and 6B and further discussed in Text  
363 S1. The prevalence of all examined categories of stress survival and resistance genes was  
364 highest in the isolates from food processing environments ( $p < 0.003$ ; Table S7) (Fig. 6C).  
365 Comparison of the clinical and environmental isolates showed a higher prevalence among  
366 clinical isolates in all categories of stress survival determinants ( $p < 0.006$ ), with the exception of  
367 biofilm associated ( $p = 0.688$ ) and arsenic resistance genes ( $p = 0.131$ ). Of note, none of the 218  
368 isolates collected from rural, urban, and farm environments harbored the *bcrABC* or *qacH* QAC  
369 resistance genes or *inlA* PMSC mutations.

370 Within the 1098 examined *L. monocytogenes* genomes, the prevalence of *inlA* PMSC truncation  
371 mutations was 9% and 41% in lineages I and II, respectively. In contrast, the 3CD *inlA* genotype  
372 associated with increased invasion (68, 69) showed an occurrence of 14% in lineage I, but was  
373 detected only once among the lineage II isolates (in CC89) (Fig. 2A and Fig. 6AB).

## 374 Discussion

375 To gain a better understanding of the population structure and genomic diversity of *L.*  
376 *monocytogenes* in Norwegian food chains, genome sequences from 769 *L. monocytogenes*

377 isolates from the Norwegian food industry collected over three decades from 15 food  
378 processing factories were characterized using WGS-based comparative genomic analyses. The  
379 study showed that 56% of isolates were closely related (2-20 wgMLST allelic differences) to an  
380 isolate collected from a different factory. These isolates were designated as *pervasive*, a term  
381 which has previously been used to describe subpopulations of bacteria with enhanced ability to  
382 spread or migrate to new geographical locations (8, 9). Several other studies have similarly  
383 reported that *L. monocytogenes* isolates from geographically and temporally unrelated sources  
384 were separated by equally short genetic distances (2, 12-18). WGS analyses are increasingly  
385 used in epidemiology and have in recent years been essential for solving several European  
386 foodborne listeriosis outbreaks (72-75). However, as we know from the use of DNA as forensic  
387 evidence in criminal trials, the apparent certainty of DNA evidence can be deceptive, and there  
388 is a danger that the statistical significance of a DNA match can be overstated (76, 77). This is  
389 particularly likely in the case of bacteria which reproduce using binary fission and especially for  
390 *L. monocytogenes* which has an extremely low evolutionary rate (16, 19). Indeed, in one case  
391 described by Lüth *et al.* (18), the same *L. monocytogenes* strain identified in two different  
392 processing plants matched the same CC5 outbreak cluster. There is a risk that authorities could  
393 mistakenly consider a WGS match between two bacterial isolates as proof of identification of a  
394 contamination source, also in cases lacking other epidemiological evidence. It is therefore of  
395 crucial importance to consider the possibility of highly similar isolates being found in multiple  
396 factories when WGS analyses of *L. monocytogenes* are performed, both for outbreak  
397 investigations and for food safety risk-based decisions and risk assessment in food industry. The  
398 high prevalence of *L. monocytogenes* isolates identified in more than one processing plant in the

399 current study suggests that the occurrence of pervasive strains in the Norwegian food industry –  
400 particularly in the meat distribution chain where 70% of isolates were pervasive – may be  
401 significantly higher than in other countries. This possibly reflects a particularly complex and  
402 interconnected Norwegian meat supply chain. Regardless, mistaken identification of an  
403 outbreak source can have enormous economic impacts and cause significant food waste due to  
404 unnecessary recalls. Examples include the German 2011 outbreak of enterohaemorrhagic  
405 *Escherichia coli* (EHEC) where initially cucumbers imported from Spain were erroneously  
406 implicated as the source of the infections (78, 79), and the Norwegian 2006 EHEC outbreak  
407 caused by contaminated traditional cured sausage (“morrpølse”), in which minced meat was  
408 initially indicated as the source (80).

409 The prevalence of genetic determinants associated with stress survival, metal and biocide  
410 resistance and biofilm formation, as well as PMSC mutations in *inlA*, was higher in isolates  
411 collected from food processing environments than among clinical isolates and isolates from  
412 natural environments, thus supporting previous studies suggesting that these factors are  
413 involved in the adaptation to food processing environments (21, 35, 39, 64, 69, 81, 82). Notably,  
414 none of the 218 isolates from natural environments contained biocide resistance genes *qacH*,  
415 *bcrABC*, or *inlA* PMSC mutations. This concurs with a recent study of *L. monocytogenes* collected  
416 from surface waters in California (83), in which *qacH* and *bcrABC* were detected in zero and 18  
417 isolates respectively, while *inlA* PMSC mutations were present in only four of 1248 examined  
418 isolates. In contrast, we identified *qacH* or *bcrABC* genes in 45% and *inlA* PMSC mutations in  
419 51% of isolates from food processing environments. These values coincide with data from  
420 numerous previous studies (26, 28, 68, 81, 82). Antibiotic resistance determinants present on

421 mobile genetic elements appear to have low prevalence in *L. monocytogenes* isolated in  
422 Norway, as only one such antibiotic resistance gene was detected among the 1098 examined  
423 genomes (a *tet(M)* tetracycline resistance gene in a clinical isolate). This is lower than that  
424 recently reported among isolates from other countries (84-89).

425 It is acknowledged that the distribution and abundance of *L. monocytogenes* CCs varies between  
426 different environments, such as humans, animals, soil, water, plants, and various types of food,  
427 and that this is likely driven by selective adaptation (2, 22, 24, 29, 90-93). However, the same is  
428 not always true when comparing persistent and transient isolates from food processing  
429 environments, although it is highly likely that inheritable genetic traits are responsible also for  
430 the ability to survive long-term in food processing facilities. It is frequently reported that certain  
431 CCs have been identified as persistent in food processing environments, notably CC9 and CC121,  
432 however, persistent strains have been detected in many CCs including CC5, CC7, CC8, CC31,  
433 CC155, and CC321 (14, 16, 18, 21, 26, 94-99). This largely corresponds with observations from  
434 the current study, in which CC7, CC8, CC9 and CC121 were identified as persistent in the  
435 greatest number of processing plants. Nevertheless, persistent strains were identified within 15  
436 of the 25 CCs represented by more than one isolate (60%), including in three lineage I CCs and  
437 12 lineage II CCs.

438 It is likely that the genetic basis behind increased prevalence of certain *L. monocytogenes* in  
439 food processing environments aligns with the genetic basis behind persistence in the ecological  
440 sense of the word, i.e., an increased ability to survive long-term in food processing  
441 environments (5, 6). There is some evidence of association of persistence with the presence of  
442 the *bcrABC* cassette conferring resistance to QAC disinfection agents (26, 39, 100) and perhaps

443 also biofilm formation capacity (30, 99). However, several studies have failed to identify any  
444 phenotypic or genotypic differences between persistent and transient *L. monocytogenes* (6, 95,  
445 101, 102) or failed to associate persistent strains with differences in stress response, sanitizer  
446 resistance, or adhesion properties (16, 25, 32, 70, 102-104). In line with these reports, the  
447 current study showed a relatively weak statistically significant association ( $p \leq 0.04$ ) between  
448 persistence and QAC resistance determinants and biofilm-associated genes, and none between  
449 persistence and plasmids, heavy metal resistance genes, SSIs, or *inlA* PMSC mutations. In  
450 contrast, we found that pervasive isolates, belonging to strains present in more than one  
451 factory, showed strong statistically significant association ( $p < 0.001$ ) with all examined  
452 categories of stress survival and persistence genes, as well as towards plasmids and several  
453 individual genes or gene loci. Pervasive strains were identified in eight CCs: one belonging to  
454 lineage I and seven belonging to lineage II. Notably, only a small proportion of pervaders were  
455 classified as non-persistent (i.e., transient). It thus appeared that strains that occurred at several  
456 factories and were repeatedly isolated over time in one or more of these facilities were more  
457 likely to show problematic properties, i.e., carry genetic determinants that enable them to  
458 establish as house strains and disperse to new environments. Our results furthermore support  
459 the hypothesis that there is not one single genetic determinant responsible for survival in food  
460 processing environments, but rather an accumulation of stress resistance genes, biofilm  
461 associated genes, and *inlA* PMSC mutations.

462 The identity of the isolates classified as non-persistent pervaders in the current study exemplify  
463 one of the difficulties in separating between “true” persistent and “true” transient isolates using  
464 operational definitions. These included 82 isolates of which 55 were from the previously

465 described contaminated second-hand slicer line isolated from factory M4 (10). These were not  
466 defined as persistent, as the contamination was only detected during an eight-week period in  
467 2014 in which the slicer line was installed in the factory. However, from an ecological viewpoint,  
468 they obviously belonged to a house strain established in a difficult to clean niche (5, 6). Another  
469 challenge with operational definitions of persistence is that strains without any specific adaptive  
470 features responsible for increased survival in processing environments may survive there under  
471 permissive conditions, e.g., in a period with higher temperatures or inadequate cleaning and  
472 sanitation, or alternatively, reoccurrence can be due to repeated introduction from an outside  
473 reservoir (7, 46). Therefore, even when using a sampling method targeted towards house  
474 strains, including sampling after cleaning and disinfection and detection of reoccurrence over a  
475 longer time-period, the obtained isolates may not carry specific genetic determinants for  
476 survival in the factory environment. The results from the current study suggest that the  
477 operational definition of pervasion is superior to those used to define persistence in identifying  
478 strains that carry adaptations responsible for increased ability to survive and multiply in food  
479 processing environments.

## 480 Material and methods

### 481 Source of isolates

482 The isolates from food processing environment, raw materials and processed foods included in  
483 the study are listed in Table S1 and were from the *L. monocytogenes* strain collection at Nofima,  
484 Norway. A total of 305 isolates from both meat and salmon industry were collected during  
485 2011-2015 as part of a previous study (38). The majority of these were isolated after sanitation,

486 and before start of production. Most of the isolates obtained after 2016 were from the  
487 factories' own sampling programs, and for these, sampling was mainly performed during  
488 production. A subset of 252 isolates belonging to CC8 and CC9 has been described in previous  
489 studies (10, 11).

## 490 [WGS and genome assembly](#)

491 Bacteria were grown on BHI agar overnight at 37 °C before a loopful of cells was suspended in  
492 500 µl 2x Tris-EDTA buffer with 1.2 % Triton X-100. Cells were lysed using lysing matrix B and a  
493 FastPrep instrument (both MP Biomedicals), and genomic DNA was isolated using the DNeasy  
494 blood and tissue kit (Qiagen). Libraries were prepared using the Nextera XT DNA sample  
495 preparation kit or the Nextera DNA Flex Library prep kit (both Illumina) and sequenced on a  
496 MiSeq platform with 300-bp paired-end reads. Raw reads were filtered on q15 and trimmed of  
497 adaptors before *de novo* genome assembly was performed using SPAdes v3.10.0 or v.3.13.0  
498 (105) with the careful option and six k-mer sizes (21, 33, 55, 77, 99, and 127). Contigs with sizes  
499 of <500 bp and *k*-mer coverage of <5 were removed from the assemblies (a coverage cutoff 15  
500 was used for MF7896). The average coverage for the genome assemblies was calculated using  
501 BBmap v36.92 (106). The quality of all assemblies was evaluated using QUAST v5.0.2 (107).

## 502 [MLST analyses](#)

503 Classical MLST analysis followed the MLST scheme described by Ragon *et al.* (42) and the  
504 database maintained at the Institute Pasteur's *L. monocytogenes* online MLST repository  
505 (<http://bigsddb.web.pasteur.fr/listeria/listeria.html>). CC14 and CC91 were defined as previously  
506 described (2). The wgMLST analysis was performed using a whole-genome scheme containing



507 4797 coding loci from the *L. monocytogenes* pan-genome and the assembly-based BLAST  
508 approach, implemented in BioNumerics 7.6 ([http://www.applied-maths.com/news/listeria-](http://www.applied-maths.com/news/listeria-monocytogenes-whole-genome-sequence-typing)  
509 [monocytogenes-whole-genome-sequence-typing](http://www.applied-maths.com/news/listeria-monocytogenes-whole-genome-sequence-typing)).

510 Minimum spanning trees were constructed using BioNumerics based on the categorical  
511 differences in the allelic wgMLST profiles for each isolate. Loci with no allele calls were not  
512 considered in the pairwise comparison between two genomes. The number of allelic differences  
513 between isolates was read from genetic distance matrices computed from the absolute number  
514 of categorical differences between genomes.

515 Calculation of pairwise wgMLST distances for Neighbor-Joining (NJ) trees was performed using  
516 the daisy function (108) from the cluster package v2.1.1 (109) in R and selection of the gower  
517 metric. NJ trees were generated using an improved version of the NJ algorithm (BION) (110)  
518 implemented in the ape package v5.4-1 (111) in R v4.0.4 (112) as function bionjs. Interactive  
519 Tree Of Life (iTOL) v6.5.2 (113) was used for visualization.

## 520 SNP analysis

521 Read mapping based SNP analysis was performed separately for each CC. An internal reference  
522 genome was selected from each CC (listed in Table S1) using the following criteria: Centrally  
523 positioned in CC clusters by wgMLST analysis, from larger sub-clusters if more than one cluster  
524 was present in a CC, older isolates preferred to more recent isolates, higher quality assemblies  
525 (high coverage, few contigs) preferred. The reference based SNP analysis was performed using  
526 the CFSAN SNP pipeline v2.1.1 (57) and default filtering settings, except that regions of high-  
527 density SNPs were defined for each sample individually instead of filtering a dense region found

528 in any genome from all genomes. The default filtering removes SNPs located closer than 500 bp  
529 to the end of a contig on the reference genome, SNPs where there are more than 3 SNPs in a  
530 1000 base window, more than 2 SNPs in a 125 base window, and more than 1 SNP in a 15 base  
531 window, reads with map quality below than 30, reads with a base quality of at least 15 at a  
532 given position, SNPs where less than 90% of the calls agree, and SNPs with a read coverage of  
533 less than 5. Results were read from the output matrix of pairwise SNP distances.

#### 534 **BLAST analyses**

535 The selection of plasmids included in the current analysis was based on a study by Chmielowska  
536 *et al.* (58), which included 113 unique completely sequenced plasmid replicons from *Listeria*  
537 spp. strains, of which 63 were assigned to 19 groups (different only by point mutations or small  
538 indels of size <1 kb). In the current analysis, one plasmid each from the 19 groups (selecting the  
539 largest plasmid in each group) and the 50 plasmids that did not belong to a group were  
540 included, in total 69 different plasmids (Table S8). All contigs >2000 bp from the *L.*  
541 *monocytogenes* genomes were used as queries in a BLAST search (blastn v2.10.0+) against a  
542 local nucleotide BLAST database created for the 69 *Listeria* spp. plasmids. A contig was viewed  
543 as a plasmid contig if the query coverage (qcov) was  $\geq 85\%$ , and the percentage identity of the  
544 best alignment was  $>90\%$ . Hits were inspected manually.

545 A BLAST search for plasmid replication genes was carried out using one *repA* gene selected from  
546 each of the eleven RepA groups (G1-G11) identified by Chmielowska *et al.* (58) as queries (Table  
547 S9), against a local nucleotide BLAST database created for the *L. monocytogenes* genomes. The  
548 same analysis was also performed using as queries the nine plasmid-encoded/associated  
549 genetic elements involved in stress response identified by Schmitz-Esser *et al.* (63), as well as

550 additional genetic elements associated with stress response and resistance (Table S4) and the  
551 entire content of the ResFinder database (59) downloaded on November 11, 2021. Only the  
552 best hit for each query sequence in each genome was kept. When the minimum nucleotide  
553 identity was <99%, and/or the length ratio of the query sequence relative to the match in the  
554 genome (length/qlen) was  $\neq 1$ , the alignments and contigs were manually inspected before a  
555 presence/absence gene call was made. In addition, the protein sequences of the BLAST hits  
556 were aligned to the query protein sequences. A call was made for the presence of the gene if  
557 the protein identity was >92%. Differences in the nucleotide sequences that lead to alterations  
558 of the protein sequences, such as insertions, deletions, premature stop codons or elongations,  
559 were recorded.

560 The Pearson's chi-squared association test was performed using Minitab v.19.2020.1 to  
561 determine whether there was any statistically significant association between the presence or  
562 absence of stress survival genes (or groups of genes) or lineage and the source of the isolates  
563 (e.g., meat vs. salmon, clinical vs. food processing) or classification as persistent or pervasive. All  
564 tests were performed separately for pairs of categories.

### 565 [Calculation of weighted similarity scores](#)

566 Genetic associations between pervasive isolates from different factories, weighted by their  
567 similarity, and illustrated in the chord diagram in Fig. 5B were calculated as follows: All pairs of  
568 isolates from different factories separated by 20 or fewer wgMLST allelic differences were  
569 counted towards the total strength of links between factories. For these pairs, the genetic  
570 distance  $D$  was converted to a similarity score  $S = 21 - D$ . Thus, a distance of 20 wgMLST  
571 alleles corresponds to a similarity score of 1, and a distance of 0 wgMLST alleles corresponds to

572 a similarity score of 21. Of note, the lowest genetic distance separating two isolates from  
573 different factories was 2. Then, all similarity scores were grouped by CC and factory and  
574 summed to generate the final scores, which are represented by the thickness of each arc in Fig.  
575 5B. The image was created using the R package circlize (114).

## 576 [Data availability](#)

577 The raw data and assembled genomes for the 512 genomes sequenced in the current study has  
578 been submitted to NCBI as BioProject accession PRJNA689484. For GenBank and Sequence Read  
579 Archive (SRA) accession numbers, see Table S1. The assemblies were annotated using the NCBI  
580 Prokaryotic Genomes Automatic Annotation Pipeline (PGAAP) server.

## 581 [Acknowledgments](#)

582 The authors wish to thank Merete Rusås Jensen and Anette Wold Åsli at Nofima for excellent  
583 technical assistance. This work was supported by the Research Council of Norway through grant  
584 no. 294910 and the Norwegian Fund for Research Fees for Agricultural Products (FFL) through  
585 grant no. 314743.

586

## 587 References

- 588 1. **Vivant AL, Garmyn D, Piveteau P.** 2013. *Listeria monocytogenes*, a down-to-earth  
589 pathogen. *Front Cell Infect Microbiol* **3**:87.
- 590 2. **Fagerlund A, Idland L, Heir E, Møretrø T, Aspholm M, Lindbäck T, Langsrud S.** 2022. WGS  
591 analysis of *Listeria monocytogenes* from rural, urban, and farm environments in Norway:  
592 Genetic diversity, persistence, and relation to clinical and food isolates. *Appl Environ*  
593 *Microbiol* **88**:e02136-21.
- 594 3. **Colagiorgi A, Bruini I, Di Ciccio PA, Zanardi E, Ghidini S, Ianieri A.** 2017. *Listeria*  
595 *monocytogenes* biofilms in the wonderland of food industry. *Pathogens* **6**:41.
- 596 4. **NicAogáin K, O'Byrne CP.** 2016. The role of stress and stress adaptations in determining  
597 the fate of the bacterial pathogen *Listeria monocytogenes* in the food chain. *Front*  
598 *Microbiol* **7**:1865.
- 599 5. **Ferreira V, Wiedmann M, Teixeira P, Stasiewicz MJ.** 2014. *Listeria monocytogenes*  
600 persistence in food-associated environments: Epidemiology, strain characteristics, and  
601 implications for public health. *J Food Prot* **77**:150-170.
- 602 6. **Carpentier B, Cerf O.** 2011. Review - Persistence of *Listeria monocytogenes* in food  
603 industry equipment and premises. *International Journal of Food Microbiology* **145**:1-8.
- 604 7. **Belias A, Sullivan G, Wiedmann M, Ivanek R.** 2022. Factors that contribute to persistent  
605 *Listeria* in food processing facilities and relevant interventions: A rapid review. *Food*  
606 *Control* **133**:108579.

- 607 8. **Numminen E, Gutmann M, Shubin M, Marttinen P, Meric G, van Schaik W, Coque TM,**  
608 **Baquero F, Willems RJ, Sheppard SK, Feil EJ, Hanage WP, Corander J.** 2016. The impact of  
609 host metapopulation structure on the population genetics of colonizing bacteria. *J Theor*  
610 *Biol* **396**:53-62.
- 611 9. **Johnston ER, Rodriguez RL, Luo C, Yuan MM, Wu L, He Z, Schuur EA, Luo Y, Tiedje JM,**  
612 **Zhou J, Konstantinidis KT.** 2016. Metagenomics reveals pervasive bacterial populations  
613 and reduced community diversity across the Alaska tundra ecosystem. *Front Microbiol*  
614 **7**:579.
- 615 10. **Fagerlund A, Langsrud S, Møretrø T.** 2020. In-depth longitudinal study of *Listeria*  
616 *monocytogenes* ST9 isolates from the meat processing industry: Resolving diversity and  
617 transmission patterns using whole-genome sequencing. *Appl Environ Microbiol*  
618 **86**:e00579-20.
- 619 11. **Fagerlund A, Langsrud S, Schirmer BCT, Møretrø T, Heir E.** 2016. Genome analysis of  
620 *Listeria monocytogenes* sequence type 8 strains persisting in salmon and poultry  
621 processing environments and comparison with related strains. *PLoS One* **11**:e0151117.
- 622 12. **Stasiewicz MJ, Oliver HF, Wiedmann M, den Bakker HC.** 2015. Whole-genome sequencing  
623 allows for improved identification of persistent *Listeria monocytogenes* in food-associated  
624 environments. *Appl Environ Microbiol* **81**:6024-6037.
- 625 13. **Morganti M, Scaltriti E, Cozzolino P, Bolzoni L, Casadei G, Pierantoni M, Foni E, Pongolini**  
626 **S.** 2016. Processing-dependent and clonal contamination patterns of *Listeria*

- 627 *monocytogenes* in the cured ham food chain revealed by genetic analysis. Appl Environ  
628 Microbiol **82**:822-831.
- 629 14. **Centorotola G, Guidi F, D'Aurizio G, Salini R, Di Domenico M, Ottaviani D, Petruzzelli A,**  
630 **Fisichella S, Duranti A, Tonucci F, Acciari VA, Torresi M, Pomilio F, Blasi G.** 2021. Intensive  
631 environmental surveillance plan for *Listeria monocytogenes* in food producing plants and  
632 retail stores of central Italy: Prevalence and genetic diversity. Foods **10**:1944.
- 633 15. **Holch A, Webb K, Lukjancenko O, Ussery D, Rosenthal BM, Gram L.** 2013. Genome  
634 sequencing identifies two nearly unchanged strains of persistent *Listeria monocytogenes*  
635 isolated at two different fish processing plants sampled 6 years apart. Appl Environ  
636 Microbiol **79**:2944-2951.
- 637 16. **Knudsen GM, Nielsen JB, Marvig RL, Ng Y, Worning P, Westh H, Gram L.** 2017. Genome-  
638 wide-analyses of *Listeria monocytogenes* from food-processing plants reveal clonal  
639 diversity and date the emergence of persisting sequence types. Environ Microbiol Rep  
640 **9**:428-440.
- 641 17. **Lundén JM, Autio TJ, Korkeala HJ.** 2002. Transfer of persistent *Listeria monocytogenes*  
642 contamination between food-processing plants associated with a dicing machine. J Food  
643 Prot **65**:1129-1133.
- 644 18. **Lüth S, Halbedel S, Rosner B, Wilking H, Holzer A, Roedel A, Dieckmann R, Vincze S,**  
645 **Prager R, Flieger A, Al Dahouk S, Kleta S.** 2020. Backtracking and forward checking of  
646 human listeriosis clusters identified a multiclonal outbreak linked to *Listeria*

- 647 *monocytogenes* in meat products of a single producer. *Emerg Microbes Infect* **9**:1600-  
648 1608.
- 649 19. **Moura A, Criscuolo A, Pouseele H, Maury MM, Leclercq A, Tarr C, Björkman JT, Dallman**  
650 **T, Reimer A, Enouf V, Larssonneur E, Carleton H, Bracq-Dieye H, Katz LS, Jones L, Touchon**  
651 **M, Tourdjman M, Walker M, Stroika S, Cantinelli T, Chenal-Francisque V, Kucerova Z,**  
652 **Rocha EPC, Nadon C, Grant K, Nielsen EM, Pot B, Gerner-Smidt P, Lecuit M, Brisse S.**  
653 2016. Whole genome-based population biology and epidemiological surveillance of  
654 *Listeria monocytogenes*. *Nat Microbiol* **2**:16185.
- 655 20. **Gray MJ, Zadoks RN, Fortes ED, Dogan B, Cai S, Chen Y, Scott VN, Gombas DE, Boor KJ,**  
656 **Wiedmann M.** 2004. *Listeria monocytogenes* isolates from foods and humans form  
657 distinct but overlapping populations. *Appl Environ Microbiol* **70**:5833-5841.
- 658 21. **Palma F, Brauge T, Radomski N, Mallet L, Felten A, Mistou MY, Brisabois A, Guillier L,**  
659 **Midelet-Bourdin G.** 2020. Dynamics of mobile genetic elements of *Listeria monocytogenes*  
660 persisting in ready-to-eat seafood processing plants in France. *BMC Genom* **21**:130.
- 661 22. **Maury MM, Bracq-Dieye H, Huang L, Vales G, Lavina M, Thouvenot P, Disson O, Leclercq**  
662 **A, Brisse S, Lecuit M.** 2019. Hypervirulent *Listeria monocytogenes* clones' adaptation to  
663 mammalian gut accounts for their association with dairy products. *Nat Commun* **10**:2488.
- 664 23. **Bergholz TM, Shah MK, Burall LS, Rakic-Martinez M, Datta AR.** 2018. Genomic and  
665 phenotypic diversity of *Listeria monocytogenes* clonal complexes associated with human  
666 listeriosis. *Appl Microbiol Biotechnol* **102**:3475-3485.



- 667 24. **Félix B, Feurer C, Maillet A, Guillier L, Boscher E, Kerouanton A, Denis M, Roussel S.**  
668 2018. Population genetic structure of *Listeria monocytogenes* strains isolated from the pig  
669 and pork production chain in France. *Front Microbiol* **9**:684.
- 670 25. **Gray J, Chandry PS, Kaur M, Kocharunchitt C, Fanning S, Bowman JP, Fox EM.** 2021.  
671 Colonisation dynamics of *Listeria monocytogenes* strains isolated from food production  
672 environments. *Sci Rep* **11**:12195.
- 673 26. **Cherifi T, Carrillo C, Lambert D, Miniaï I, Quessy S, Larivière-Gauthier G, Blais B, Fravallo**  
674 **P.** 2018. Genomic characterization of *Listeria monocytogenes* isolates reveals that their  
675 persistence in a pig slaughterhouse is linked to the presence of benzalkonium chloride  
676 resistance genes. *BMC Microbiol* **18**:220.
- 677 27. **Hingston P, Chen J, Dhillon BK, Laing C, Bertelli C, Gannon V, Tasara T, Allen K, Brinkman**  
678 **FS, Truelstrup Hansen L, Wang S.** 2017. Genotypes associated with *Listeria*  
679 *monocytogenes* isolates displaying impaired or enhanced tolerances to cold, salt, acid, or  
680 desiccation stress. *Front Microbiol* **8**:369.
- 681 28. **Unrath N, McCabe E, Macori G, Fanning S.** 2021. Application of whole genome  
682 sequencing to aid in deciphering the persistence potential of *Listeria monocytogenes* in  
683 food production environments. *Microorganisms* **9**:1856.
- 684 29. **Disson O, Moura A, Lecuit M.** 2021. Making sense of the biodiversity and virulence of  
685 *Listeria monocytogenes*. *Trends Microbiol* **29**:811-822.
- 686 30. **Møretrø T, Langsrud S.** 2004. *Listeria monocytogenes*: Biofilm formation and persistence  
687 in food processing environments. *Biofilms* **1**:107-121.

- 688 31. **Rodríguez-López P, Rodríguez-Herrera JJ, Vázquez-Sánchez D, Lopez Cabo M.** 2018.  
689 Current knowledge on *Listeria monocytogenes* biofilms in food-related environments:  
690 Incidence, resistance to biocides, ecology and biocontrol. *Foods* **7**.
- 691 32. **Nowak J, Cruz CD, Tempelaars M, Abee T, van Vliet AHM, Fletcher GC, Hedderley D,**  
692 **Palmer J, Flint S.** 2017. Persistent *Listeria monocytogenes* strains isolated from mussel  
693 production facilities form more biofilm but are not linked to specific genetic markers. *Int J*  
694 *Food Microbiol* **256**:45-53.
- 695 33. **Naditz AL, Dzieciol M, Wagner M, Schmitz-Esser S.** 2019. Plasmids contribute to food  
696 processing environment-associated stress survival in three *Listeria monocytogenes* ST121,  
697 ST8, and ST5 strains. *Int J Food Microbiol* **299**:39-46.
- 698 34. **Minarovičová J, Véghová A, Mikulášová M, Chovanová R, Šoltýs K, Drahovská H,**  
699 **Kačílková E.** 2018. Benzalkonium chloride tolerance of *Listeria monocytogenes* strains  
700 isolated from a meat processing facility is related to presence of plasmid-borne *bcrABC*  
701 cassette. *Antonie Van Leeuwenhoek* **111**:1913-1923.
- 702 35. **Hingston P, Brenner T, Truelstrup Hansen L, Wang S.** 2019. Comparative analysis of  
703 *Listeria monocytogenes* plasmids and expression levels of plasmid-encoded genes during  
704 growth under salt and acid stress conditions. *Toxins (Basel)* **11**:426.
- 705 36. **Müller A, Rychli K, Zaiser A, Wieser C, Wagner M, Schmitz-Esser S.** 2014. The *Listeria*  
706 *monocytogenes* transposon Tn6188 provides increased tolerance to various quaternary  
707 ammonium compounds and ethidium bromide. *FEMS Microbiol Lett* **361**:166-173.

- 708 37. **Vergheze B, Lok M, Wen J, Alessandria V, Chen Y, Kathariou S, Knabel S.** 2011. *comK*  
709 prophage junction fragments as markers for *Listeria monocytogenes* genotypes unique to  
710 individual meat and poultry processing plants and a model for rapid niche-specific  
711 adaptation, biofilm formation, and persistence. *Appl Environ Microbiol* **77**:3279-3292.
- 712 38. **Møretrø T, Schirmer BCT, Heir E, Fagerlund A, Hjemli P, Langsrud S.** 2017. Tolerance to  
713 quaternary ammonium compound disinfectants may enhance growth of *Listeria*  
714 *monocytogenes* in the food industry. *Int J Food Microbiol* **241**:215-224.
- 715 39. **Martínez-Suárez JV, Ortiz S, López-Alonso V.** 2016. Potential impact of the resistance to  
716 quaternary ammonium disinfectants on the persistence of *Listeria monocytogenes* in food  
717 processing environments. *Front Microbiol* **7**:638.
- 718 40. **Dutta V, Elhanafi D, Kathariou S.** 2013. Conservation and distribution of the benzalkonium  
719 chloride resistance cassette *bcrABC* in *Listeria monocytogenes*. *Appl Environ Microbiol*  
720 **79**:6067-6074.
- 721 41. **Nightingale KK, Windham K, Martin KE, Yeung M, Wiedmann M.** 2005. Select *Listeria*  
722 *monocytogenes* subtypes commonly found in foods carry distinct nonsense mutations in  
723 *inlA*, leading to expression of truncated and secreted internalin A, and are associated with  
724 a reduced invasion phenotype for human intestinal epithelial cells. *Appl Environ Microbiol*  
725 **71**:8764-8772.
- 726 42. **Ragon M, Wirth T, Hollandt F, Lavenir R, Lecuit M, Le Monnier A, Brisse S.** 2008. A new  
727 perspective on *Listeria monocytogenes* evolution. *PLoS Pathog* **4**:e1000146.

- 728 43. **Mahoney DBJ, Falardeau J, Hingston P, Chmielowska C, Carroll LM, Wiedmann M, Jang**  
729 **SS, Wang S.** 2022. Associations between *Listeria monocytogenes* genomic characteristics  
730 and adhesion to polystyrene at 8 °C. *Food Microbiol* **102**:103915.
- 731 44. **Franciosa G, Maugliani A, Scalfaro C, Floridi F, Aureli P.** 2009. Expression of internalin A  
732 and biofilm formation among *Listeria monocytogenes* clinical isolates. *Int J Immunopathol*  
733 *Pharmacol* **22**:183-193.
- 734 45. **Piercey MJ, Hingston PA, Truelstrup Hansen L.** 2016. Genes involved in *Listeria*  
735 *monocytogenes* biofilm formation at a simulated food processing plant temperature of 15  
736 °C. *Int J Food Microbiol* **223**:63-74.
- 737 46. **Spanu C, Jordan K.** 2020. *Listeria monocytogenes* environmental sampling program in  
738 ready-to-eat processing facilities: A practical approach. *Compr Rev Food Sci Food Saf*  
739 **19**:2843-2861.
- 740 47. **Pightling AW, Pettengill JB, Luo Y, Baugher JD, Rand H, Strain E.** 2018. Interpreting  
741 whole-genome sequence analyses of foodborne bacteria for regulatory applications and  
742 outbreak investigations. *Front Microbiol* **9**:1482.
- 743 48. **Jagadeesan B, Gerner-Smidt P, Allard MW, Leuillet S, Winkler A, Xiao Y, Chaffron S, Van**  
744 **Der Vossen J, Tang S, Katase M, McClure P, Kimura B, Ching Chai L, Chapman J, Grant K.**  
745 2019. The use of next generation sequencing for improving food safety: Translation into  
746 practice. *Food Microbiol* **79**:96-115.
- 747 49. **Zamudio R, Haigh RD, Ralph JD, De Ste Croix M, Tasara T, Zurfluh K, Kwun MJ, Millard**  
748 **AD, Bentley SD, Croucher NJ, Stephan R, Oggioni MR.** 2020. Lineage-specific evolution

- 749 and gene flow in *Listeria monocytogenes* are independent of bacteriophages. Environ  
750 Microbiol **22**:5058-5072.
- 751 50. **Ruppitsch W, Pietzka A, Prior K, Bletz S, Fernandez HL, Allerberger F, Harmsen D,**  
752 **Mellmann A.** 2015. Defining and evaluating a core genome multilocus sequence typing  
753 scheme for whole-genome sequence-based typing of *Listeria monocytogenes*. J Clin  
754 Microbiol **53**:2869-2876.
- 755 51. **Wang Y, Pettengill JB, Pightling A, Timme R, Allard M, Strain E, Rand H.** 2018. Genetic  
756 diversity of *Salmonella* and *Listeria* isolates from food facilities. J Food Prot **81**:2082-2089.
- 757 52. **Allard MW, Strain E, Rand H, Melka D, Correll WA, Hintz L, Stevens E, Timme R,**  
758 **Lomonaco S, Chen Y, Musser SM, Brown EW.** 2019. Whole genome sequencing uses for  
759 foodborne contamination and compliance: Discovery of an emerging contamination event  
760 in an ice cream facility using whole genome sequencing. Infect Genet Evol **73**:214-220.
- 761 53. **Jagadeesan B, Baert L, Wiedmann M, Orsi RH.** 2019. Comparative analysis of tools and  
762 approaches for source tracking *Listeria monocytogenes* in a food facility using whole-  
763 genome sequence data. Front Microbiol **10**:947.
- 764 54. **Henri C, Leekitcharoenphon P, Carleton HA, Radomski N, Kaas RS, Mariet JF, Felten A,**  
765 **Aarestrup FM, Gerner Smidt P, Roussel S, Guillier L, Mistou MY, Hendriksen RS.** 2017. An  
766 assessment of different genomic approaches for inferring phylogeny of *Listeria*  
767 *monocytogenes*. Front Microbiol **8**:2351.
- 768 55. **Chen Y, Gonzalez-Escalona N, Hammack TS, Allard MW, Strain EA, Brown EW.** 2016. Core  
769 genome multilocus sequence typing for identification of globally distributed clonal groups

- 770 and differentiation of outbreak strains of *Listeria monocytogenes*. *Appl Environ Microbiol*  
771 **82**:6258-6272.
- 772 56. **Van Walle I, Björkman JT, Cormican M, Dallman T, Mossong J, Moura A, Pietzka A,**  
773 **Ruppitsch W, Takkinen J, European Listeria WGS Typing Group.** 2018. Retrospective  
774 validation of whole genome sequencing-enhanced surveillance of listeriosis in Europe,  
775 2010 to 2015. *Euro Surveill* **23**:1700798.
- 776 57. **Davis S, Pettengill JB, Luo Y, Payne J, Shpuntoff A, Rand H, Strain E.** 2015. CFSAN SNP  
777 Pipeline: an automated method for constructing SNP matrices from next-generation  
778 sequence data. *PeerJ Comput Sci* **1**:e20.
- 779 58. **Chmielowska C, Korsak D, Chapkauskaitse E, Decewicz P, Lasek R, Szuplewska M,**  
780 **Bartosik D.** 2021. Plasmidome of *Listeria* spp. – The *repA*-family business. *Int J Mol Sci*  
781 **22**:10320.
- 782 59. **Zankari E, Hasman H, Cosentino S, Vestergaard M, Rasmussen S, Lund O, Aarestrup FM,**  
783 **Larsen MV.** 2012. Identification of acquired antimicrobial resistance genes. *J Antimicrob*  
784 *Chemother* **67**:2640-2644.
- 785 60. **Fillgrove KL, Pakhomova S, Newcomer ME, Armstrong RN.** 2003. Mechanistic diversity of  
786 fosfomycin resistance in pathogenic microorganisms. *J Am Chem Soc* **125**:15730-15731.
- 787 61. **Parsons C, Lee S, Kathariou S.** 2020. Dissemination and conservation of cadmium and  
788 arsenic resistance determinants in *Listeria* and other Gram-positive bacteria. *Mol*  
789 *Microbiol* **113**:560-569.

- 790 62. **Müller A, Rychli K, Muhterem-Uyar M, Zaiser A, Stessl B, Guinane CM, Cotter PD,**  
791 **Wagner M, Schmitz-Esser S.** 2013. Tn6188 - a novel transposon in *Listeria monocytogenes*  
792 responsible for tolerance to benzalkonium chloride. PLoS One **8**:e76835.
- 793 63. **Schmitz-Esser S, Anast JM, Cortes BW.** 2021. A large-scale sequencing-based survey of  
794 plasmids in *Listeria monocytogenes* reveals global dissemination of plasmids. Front  
795 Microbiol **12**:653155.
- 796 64. **Harter E, Wagner EM, Zaiser A, Halecker S, Wagner M, Rychli K.** 2017. Stress Survival Islet  
797 2, predominantly present in *Listeria monocytogenes* strains of sequence type 121, is  
798 involved in the alkaline and oxidative stress responses. Appl Environ Microbiol **83**:e00827-  
799 17.
- 800 65. **Ryan S, Begley M, Hill C, Gahan CG.** 2010. A five-gene stress survival islet (SSI-1) that  
801 contributes to the growth of *Listeria monocytogenes* in suboptimal conditions. J Appl  
802 Microbiol **109**:984-995.
- 803 66. **Jordan SJ, Perni S, Glenn S, Fernandes I, Barbosa M, Sol M, Tenreiro RP, Chambel L,**  
804 **Barata B, Zilhao I, Aldsworth TG, Adriaio A, Faleiro ML, Shama G, Andrew PW.** 2008.  
805 *Listeria monocytogenes* biofilm-associated protein (BapL) may contribute to surface  
806 attachment of *L. monocytogenes* but is absent from many field isolates. Appl Environ  
807 Microbiol **74**:5451-5456.
- 808 67. **Popowska M, Krawczyk-Balska A, Ostrowski R, Desvaux M.** 2017. InlL from *Listeria*  
809 *monocytogenes* is involved in biofilm formation and adhesion to mucin. Front Microbiol  
810 **8**:660.

- 811 68. **Kovacevic J, Arguedas-Villa C, Wozniak A, Tasara T, Allen KJ.** 2013. Examination of food  
812 chain-derived *Listeria monocytogenes* strains of different serotypes reveals considerable  
813 diversity in *inlA* genotypes, mutability, and adaptation to cold temperatures. *Appl Environ*  
814 *Microbiol* **79**:1915-1922.
- 815 69. **Upham J, Chen S, Boutilier E, Hodges L, Eisebraun M, Croxen MA, Fortuna A, Mallo GV,**  
816 **Garduño RA.** 2019. Potential ad hoc markers of persistence and virulence in Canadian  
817 *Listeria monocytogenes* food and clinical isolates. *J Food Prot* **82**:1909-1921.
- 818 70. **Heir E, Lindstedt BA, Rotterud OJ, Vardund T, Kapperud G, Nesbakken T.** 2004. Molecular  
819 epidemiology and disinfectant susceptibility of *Listeria monocytogenes* from meat  
820 processing plants and human infections. *Int J Food Microbiol* **96**:85-96.
- 821 71. **Baines SL, da Silva AG, Carter GP, Jennison A, Rathnayake I, Graham RM, Sintchenko V,**  
822 **Wang Q, Rockett RJ, Timms VJ, Martinez E, Ballard S, Tomita T, Isles N, Horan KA,**  
823 **Pitchers W, Stinear TP, Williamson DA, Howden BP, Seemann T, Communicable Diseases**  
824 **Genomics Network (CDGN).** 2020. Complete microbial genomes for public health in  
825 Australia and the Southwest Pacific. *Microb Genom* **6**:471.
- 826 72. **Kvistholm Jensen A, Nielsen EM, Björkman JT, Jensen T, Müller L, Persson S, Bjerager G,**  
827 **Perge A, Krause TG, Kiil K, Sørensen G, Andersen JK, Mølbak K, Ethelberg S.** 2016. Whole-  
828 genome sequencing used to investigate a nationwide outbreak of listeriosis caused by  
829 ready-to-eat delicatessen meat, Denmark, 2014. *Clin Infect Dis* **63**:64-70.
- 830 73. **Halbedel S, Wilking H, Holzer A, Kleta S, Fischer MA, Lüth S, Pietzka A, Huhulescu S,**  
831 **Lachmann R, Krings A, Ruppitsch W, Leclercq A, Kamphausen R, Meincke M, Wagner-**



- 832 **Wiening C, Contzen M, Kraemer IB, Al Dahouk S, Allerberger F, Stark K, Flieger A.** 2020.  
833 Large nationwide outbreak of invasive listeriosis associated with blood sausage, Germany,  
834 2018-2019. *Emerg Infect Dis* **26**:1456-1464.
- 835 74. **Nüesch-Inderbinnen M, Bloemberg GV, Müller A, Stevens MJA, Cernela N, Kollöffel B,**  
836 **Stephan R.** 2021. Listeriosis caused by persistence of *Listeria monocytogenes* serotype 4b  
837 sequence type 6 in cheese production environment. *Emerg Infect Dis* **27**:284-288.
- 838 75. **Lachmann R, Halbedel S, Lüth S, Holzer A, Adler M, Pietzka A, Dahouk SA, Stark K, Flieger**  
839 **A, Kleta S, Wilking H.** 2022. Invasive listeriosis outbreaks and salmon products: a genomic,  
840 epidemiological study. *Emerg Microbes Infect* **11**:1308-1315.
- 841 76. **Findlay M, Grix J.** 2003. Challenging forensic evidence? Observations on the use of DNA in  
842 certain criminal trials. *Curr Issues Crim Justice* **14**:269-282.
- 843 77. **Brown TM, Geddes L, Gill P, Jesper-Mir E, Kayser M, Phillips C, Schneider PM,**  
844 **Syndercombe-Court D, Thomas J, Wienroth M, Williams RTW.** 2017. Making sense of  
845 forensic genetics. What can DNA tell you about a crime. Report published by: Sense about  
846 Science, [https://senseaboutscience.org/wp-content/uploads/2017/01/making-sense-of-](https://senseaboutscience.org/wp-content/uploads/2017/01/making-sense-of-forensic-genetics.pdf)  
847 [forensic-genetics.pdf](https://senseaboutscience.org/wp-content/uploads/2017/01/making-sense-of-forensic-genetics.pdf). Accessed 13 May 2022.
- 848 78. **Rogers K.** 2021. 8 Jun. 2021. German *E. coli* outbreak of 2011. *In* Encyclopedia Britannica.  
849 <https://www.britannica.com/event/German-E-coli-outbreak-of-2011>. Accessed 13 May  
850 2022.

- 851 79. **Köckerling E, Karrasch L, Schweitzer A, Razum O, Krause G.** 2017. Public health research  
852 resulting from one of the world's largest outbreaks caused by entero-hemorrhagic  
853 *Escherichia coli* in Germany 2011: A Review. *Front Public Health* **5**:332.
- 854 80. **Schimmer B, Nygard K, Eriksen HM, Lassen J, Lindstedt BA, Brandal LT, Kapperud G,**  
855 **Aavitsland P.** 2008. Outbreak of haemolytic uraemic syndrome in Norway caused by *stx2*-  
856 positive *Escherichia coli* O103:H25 traced to cured mutton sausages. *BMC Infect Dis* **8**:41.
- 857 81. **Manuel CS, Van Stelten A, Wiedmann M, Nightingale KK, Orsi RH.** 2015. Prevalence and  
858 distribution of *Listeria monocytogenes inlA* alleles prone to phase variation and *inlA* alleles  
859 with premature stop codon mutations among human, food, animal, and environmental  
860 isolates. *Appl Environ Microbiol* **81**:8339-8345.
- 861 82. **Van Stelten A, Simpson JM, Ward TJ, Nightingale KK.** 2010. Revelation by single-  
862 nucleotide polymorphism genotyping that mutations leading to a premature stop codon in  
863 *inlA* are common among *Listeria monocytogenes* isolates from ready-to-eat foods but not  
864 human listeriosis cases. *Appl Environ Microbiol* **76**:2783-2790.
- 865 83. **Gorski L, Cooley MB, Oryang D, Carychao D, Nguyen K, Luo Y, Weinstein L, Brown E,**  
866 **Allard M, Mandrell RE, Chen Y.** 2022. Prevalence and clonal diversity of over 1,200 *Listeria*  
867 *monocytogenes* isolates collected from public access waters near produce production  
868 areas on the central California coast during 2011 to 2016. *Appl Environ Microbiol*  
869 **88**:e0035722.
- 870 84. **Yan S, Li M, Luque-Sastre L, Wang W, Hu Y, Peng Z, Dong Y, Gan X, Nguyen S, Anes J, Bai**  
871 **Y, Xu J, Fanning S, Li F.** 2019. Susceptibility (re)-testing of a large collection of *Listeria*

- 872 monocytophages from foods in China from 2012 to 2015 and WGS characterization of  
873 resistant isolates. *J Antimicrob Chemother* **74**:1786-1794.
- 874 85. **Zhang X, Liu Y, Zhang P, Niu Y, Chen Q, Ma X.** 2021. Genomic characterization of clinical  
875 *Listeria monocytogenes* isolates in Beijing, China. *Front Microbiol* **12**:751003.
- 876 86. **Wu L, Bao H, Yang Z, He T, Tian Y, Zhou Y, Pang M, Wang R, Zhang H.** 2021. Antimicrobial  
877 susceptibility, multilocus sequence typing, and virulence of listeria isolated from a  
878 slaughterhouse in Jiangsu, China. *BMC Microbiol* **21**:327.
- 879 87. **Hanes RM, Huang Z.** 2022. Investigation of antimicrobial resistance genes in *Listeria*  
880 *monocytogenes* from 2010 through to 2021. *Int J Environ Res Public Health* **19**:5506.
- 881 88. **Gómez D, Azón E, Marco N, Carramiñana JJ, Rota C, Ariño A, Yangüela J.** 2014.  
882 Antimicrobial resistance of *Listeria monocytogenes* and *Listeria innocua* from meat  
883 products and meat-processing environment. *Food Microbiol* **42**:61-65.
- 884 89. **Rostamian M, Kooti S, Mohammadi B, Salimi Y, Akya A.** 2022. A systematic review and  
885 meta-analysis of *Listeria monocytogenes* isolated from human and non-human sources:  
886 the antibiotic susceptibility aspect. *Diagn Microbiol Infect Dis* **102**:115634.
- 887 90. **Orsi RH, den Bakker HC, Wiedmann M.** 2011. *Listeria monocytogenes* lineages: Genomics,  
888 evolution, ecology, and phenotypic characteristics. *Int J Med Microbiol* **301**:79-96.
- 889 91. **Maury MM, Tsai YH, Charlier C, Touchon M, Chenal-Francisque V, Leclercq A, Criscuolo**  
890 **A, Gaultier C, Roussel S, Brisabois A, Disson O, Rocha EPC, Brisse S, Lecuit M.** 2016.

- 891 Uncovering *Listeria monocytogenes* hypervirulence by harnessing its biodiversity. Nat  
892 Genet **48**:308-313.
- 893 92. **Bechtel TD, Gibbons JG.** 2021. Population genomic analysis of *Listeria monocytogenes*  
894 from food reveals substrate-specific genome variation. Front Microbiol **12**:620033.
- 895 93. **Lee S, Chen Y, Gorski L, Ward TJ, Osborne J, Kathariou S.** 2018. *Listeria monocytogenes*  
896 source distribution analysis indicates regional heterogeneity and ecological niche  
897 preference among serotype 4b clones. mBio **9**:e00396-18.
- 898 94. **Stoller A, Stevens MJA, Stephan R, Guldimann C.** 2019. Characteristics of *Listeria*  
899 *monocytogenes* strains persisting in a meat processing facility over a 4-year period.  
900 Pathogens **8**:32.
- 901 95. **Palaiodimou L, Fanning S, Fox EM.** 2021. Genomic insights into persistence of *Listeria*  
902 species in the food processing environment. J Appl Microbiol **131**:2082-2094.
- 903 96. **Melero B, Manso B, Stessl B, Hernández M, Wagner M, Rovira J, Rodríguez-Lázaro D.**  
904 2019. Distribution and persistence of *Listeria monocytogenes* in a heavily contaminated  
905 poultry processing facility. J Food Prot **82**:1524-1531.
- 906 97. **Demaître N, Rasschaert G, De Zutter L, Geeraerd A, De Reu K.** 2021. Genetic *Listeria*  
907 *monocytogenes* types in the pork processing plant environment: from occasional  
908 introduction to plausible persistence in harborage sites. Pathogens **10**:717.

- 909 98. **Rückerl I, Muhterem-Uyar M, Muri-Klinger S, Wagner KH, Wagner M, Stessl B.** 2014. *L.*  
910 *monocytogenes* in a cheese processing facility: Learning from contamination scenarios  
911 over three years of sampling. *Int J Food Microbiol* **189**:98-105.
- 912 99. **Harrand AS, Jagadeesan B, Baert L, Wiedmann M, Orsi RH.** 2020. Evolution of *Listeria*  
913 *monocytogenes* in a food processing plant involves limited single-nucleotide substitutions  
914 but considerable diversification by gain and loss of prophages. *Appl Environ Microbiol*  
915 **86**:e02493-19.
- 916 100. **Muhterem-Uyar M, Ciolacu L, Wagner KH, Wagner M, Schmitz-Esser S, Stessl B.** 2018.  
917 New aspects on *Listeria monocytogenes* ST5-ECVI Predominance in a heavily  
918 contaminated cheese processing environment. *Front Microbiol* **9**:64.
- 919 101. **Taylor AJ, Stasiewicz MJ.** 2019. Persistent and sporadic *Listeria monocytogenes* strains do  
920 not differ when growing at 37 °C, in planktonic state, under different food associated  
921 stresses or energy sources. *BMC Microbiol* **19**:257.
- 922 102. **Assisi C, Forauer E, Oliver HF, Etter AJ.** 2021. Genomic and transcriptomic analysis of  
923 biofilm formation in persistent and transient *Listeria monocytogenes* isolates from the  
924 retail deli environment does not yield insight into persistence mechanisms. *Foodborne*  
925 *Pathog Dis* **18**:179-188.
- 926 103. **Gelbířová T, Florianová M, Tomášřířková Z, Pospíšilová L, Koláčřková I, Karpíšřková R.**  
927 2019. Prediction of persistence of *Listeria monocytogenes* ST451 in a rabbit meat  
928 processing plant in the Czech Republic. *J Food Prot* **82**:1350-1356.

- 929 104. **Koreňová J, Oravcová K, Véghová A, Karpíšková R, Kuchta T.** 2016. Biofilm formation in  
930 various conditions is not a key factor of persistence potential of *Listeria monocytogenes* in  
931 food-processing environment. *J Food Nutr Res* **55**:189-193.
- 932 105. **Bankevich A, Nurk S, Antipov D, Gurevich AA, Dvorkin M, Kulikov AS, Lesin VM,**  
933 **Nikolenko SI, Son P, Prjibelski AD, Pyskin AV, Sirotkin AV, Vyahhi N, Tesler G, Alekseyev**  
934 **MA, Pevzner PA.** 2012. SPAdes: A new genome assembly algorithm and its applications to  
935 single-cell sequencing. *J Comput Biol* **19**:455-477.
- 936 106. **Bushnell B.** 2014. BBMap: A Fast, Accurate, Splice-Aware Aligner, 9th Annual Genomics of  
937 Energy & Environment Meeting, Walnut Creek, CA, USA  
938 <https://www.osti.gov/biblio/1241166-bbmap-fast-accurate-splice-aware-aligner>.
- 939 107. **Mikheenko A, Prjibelski A, Saveliev V, Antipov D, Gurevich A.** 2018. Versatile genome  
940 assembly evaluation with QUAST-LG. *Bioinformatics* **34**:i142-i150.
- 941 108. **Kaufman L, Rousseeuw PJ.** 1990. Introduction, p 1-67, Finding groups in data: An  
942 introduction to cluster analysis, Ch. 1. doi:10.1002/9780470316801.ch1. John Wiley &  
943 Sons, Inc.: Hoboken, NJ, USA.
- 944 109. **Maechler M, Rousseeuw P, Struyf A, Hubert M, Hornik K.** 2021. cluster: Cluster analysis  
945 basics and extensions. R package version 2.1.1, [https://CRAN.R-](https://CRAN.R-project.org/package=cluster)  
946 [project.org/package=cluster](https://CRAN.R-project.org/package=cluster).
- 947 110. **Gascuel O.** 1997. BIONJ: an improved version of the NJ algorithm based on a simple model  
948 of sequence data. *Mol Biol Evol* **14**:685-695.

- 949 111. **Paradis E, Schliep K.** 2019. ape 5.0: an environment for modern phylogenetics and  
950 evolutionary analyses in R. *Bioinformatics* **35**:526-528.
- 951 112. **R\_Core\_Team.** 2021. R: A language and environment for statistical computing, R  
952 Foundation for Statistical Computing, Vienna, Austria. <https://www.R-project.org/>.
- 953 113. **Letunic I, Bork P.** 2021. Interactive Tree Of Life (iTOL) v5: an online tool for phylogenetic  
954 tree display and annotation. *Nucleic Acids Res* **49**:W293-W296.
- 955 114. **Gu Z, Gu L, Eils R, Schlesner M, Brors B.** 2014. *circlize* implements and enhances circular  
956 visualization in R. *Bioinformatics* **30**:2811-2812.

957 Tables

958 **Table 1: Comparison of number of differences detected in each CC using SNP and wgMLST**  
 959 **analysis<sup>a</sup>**

|                   | CC group | Number of genomes analysed | Number of detected SNPs (after filtering) | Number of differing wgMLST loci | Pairwise distance (wgMLST) |         |        |
|-------------------|----------|----------------------------|-------------------------------------------|---------------------------------|----------------------------|---------|--------|
|                   |          |                            |                                           |                                 | Maximum                    | Minimum | Median |
| <b>lineage I</b>  | CC1      | 34                         | 222                                       | 230                             | 170                        | 0       | 5      |
|                   | CC2      | 7                          | 6                                         | 11                              | 7                          | 2       | 4      |
|                   | CC3      | 24                         | 79                                        | 84                              | 74                         | 0       | 2.5    |
|                   | CC5      | 13                         | 79                                        | 88                              | 45                         | 0       | 26     |
|                   | CC6      | 3                          | 31                                        | 36                              | 35                         | 4       | 34     |
|                   | CC88     | 2                          | 9                                         | 17                              | 17                         | 17      | 17     |
|                   | CC220    | 2                          | 105                                       | 105                             | 105                        | 105     | 105    |
|                   | CC315    | 10                         | 4                                         | 11                              | 5                          | 0       | 2      |
| <b>lineage II</b> | CC7      | 68                         | 633                                       | 694                             | 198                        | 0       | 79     |
|                   | CC8      | 19                         | 203                                       | 288                             | 181                        | 1       | 37     |
|                   | CC9      | 290                        | 966                                       | 896                             | 179                        | 0       | 94     |
|                   | CC11     | 9                          | 138                                       | 215                             | 83                         | 3       | 49     |
|                   | CC14     | 20                         | 176                                       | 221                             | 103                        | 0       | 20     |
|                   | CC18     | 5                          | 106                                       | 140                             | 88                         | 2       | 63.5   |
|                   | CC19     | 55                         | 209                                       | 199                             | 105                        | 0       | 77     |
|                   | CC20     | 4                          | 57                                        | 99                              | 77                         | 3       | 56     |
|                   | CC21     | 2                          | 126                                       | 118                             | 118                        | 118     | 118    |
|                   | CC31     | 3                          | 193                                       | 198                             | 132                        | 112     | 131    |
|                   | CC37     | 14                         | 81                                        | 78                              | 50                         | 0       | 5      |
|                   | CC91     | 14                         | 468                                       | 628                             | 512                        | 0       | 102    |
|                   | CC121    | 86                         | 573                                       | 608                             | 238                        | 0       | 48     |
|                   | CC177    | 22                         | 222                                       | 223                             | 160                        | 0       | 2      |
|                   | CC199    | 3                          | 4                                         | 6                               | 6                          | 0       | 6      |
|                   | CC403    | 27                         | 19                                        | 27                              | 9                          | 0       | 2      |
| CC415             | 30       | 203                        | 231                                       | 118                             | 0                          | 81      |        |
| <b>Median</b>     |          | 14                         | 126                                       | 140                             | 103                        | 0       | 37     |

960 <sup>a</sup> CC4, CC101, and CC200 are not shown as they comprised only one isolate (from M4, M4, and M3,  
 961 respectively).



962 **Table 2: Novel or rare genetic elements**

| Isolate                       | CC          | Source and year of isolation | Genetic determinant          | Further description                                                                                                                                                                                                                            |
|-------------------------------|-------------|------------------------------|------------------------------|------------------------------------------------------------------------------------------------------------------------------------------------------------------------------------------------------------------------------------------------|
| <i>Food industry isolates</i> |             |                              |                              |                                                                                                                                                                                                                                                |
| MF6196                        | CC7         | Factory M2, 2013             | <i>repA</i> G12              | Novel <i>repA</i> variant found on a 58 Kb contig, locus tag: JKS07_13825.                                                                                                                                                                     |
| MF4562                        | CC9         | Factory M1, 2012             | <i>cadA1C1</i>               | The only food isolate with Tn4422/ <i>cadA1C1</i> located on the chromosome                                                                                                                                                                    |
| MF1548                        | CC21        | Factory M3, 1998             | <i>cadA5C5</i>               | The only genome identified with this locus. The genome also contains <i>cadA1C1</i> and both arsenic resistance operons (on LG12 and Tn554-like transposon)                                                                                    |
| <i>Clinical isolates</i>      |             |                              |                              |                                                                                                                                                                                                                                                |
| ERR2522309                    | CC1         | Clinical, 2013               | <i>repA</i> G4               | The only identified genome with this <i>repA</i> variant. Located on a 65 kb contig.                                                                                                                                                           |
|                               |             |                              | <i>qacH-like gene</i>        | A plasmid-encoded variant of QacH, 90% identical to QacH encoded on Tn6188.                                                                                                                                                                    |
| ERR2522330                    | CC7         | Clinical, 2014               | plasmid pAUSMDU00000235      | This genome contained a contig that could be circularized and was 100% identical to the 2776 bp pAUSMDU00000235 plasmid found in a clinical strain in Australia in 2009 (71).                                                                  |
| ERR2522310                    | CC7 (ST691) | Clinical, 2013               | plasmid pLMST6 (pLmN12-0935) | This genome contained a contig that aligned with 99.98% identity over 99.86% of the plasmid/contig lengths with the 4392 bp long plasmid pLMST6 (pLmN12-0935) from a clinical strain belonging to ST403/CC403 isolated in Switzerland in 2012. |
|                               |             |                              | <i>emrC</i>                  | The only genome identified with this gene is present on the plasmid.                                                                                                                                                                           |
| ERR2522285                    | CC59        | Clinical, 2012               | <i>tet(M)</i> allele 7       | The only antibiotic resistance gene identified in this study, found by search against the ResFinder database (59).                                                                                                                             |

963

964 **Table 3. *L. monocytogenes* clones with repeated isolation of same strain in same factory<sup>a</sup>**

| CC    | ST               | Processing plant |    |    |    |    |    |    |    |    |    | Niches with repeated isolation of same strain |               |              |         |       |                                                                                            |
|-------|------------------|------------------|----|----|----|----|----|----|----|----|----|-----------------------------------------------|---------------|--------------|---------|-------|--------------------------------------------------------------------------------------------|
|       |                  | M1               | M2 | M4 | M6 | M8 | S1 | S2 | S3 | S5 | S6 | Floors <sup>b</sup>                           | Drains        | Conveyors    | Gutting | Other |                                                                                            |
| CC1   | ST1              |                  |    |    |    |    |    | X  |    |    |    |                                               |               | S2           | S2      | S2    | Grader, containers                                                                         |
| CC5   | ST5              |                  |    |    | X  |    |    |    |    |    |    |                                               | M6            |              |         |       |                                                                                            |
| CC7   | ST7              |                  | X  |    | X  |    | X  | X  |    |    |    |                                               | M2, M6,<br>S1 | M2, S1       | S1      |       | M2: pallet; M6: products; S1: bone napping machine                                         |
|       | ST732            |                  |    |    |    |    |    | X  |    |    |    |                                               | S2            | S2           | S2      | S2    | Inflow tube                                                                                |
| CC8   | ST8              | X                |    |    | X  |    | X  |    |    |    |    | X                                             | M1, S1        | M1, S1       | S1      | S6    | S6: salmon; M1: all samples from raw meat department                                       |
| CC9   | ST9 <sup>c</sup> | X                |    | X  |    | X  |    |    |    |    |    |                                               | M1, M4        | M1, M4<br>M8 |         |       | M1: equipment framework (near floor); M4: 3 month period 55 isolates from slicer, products |
| CC14  | ST14             |                  |    |    |    |    |    | X  | X  |    |    |                                               | S3            | S2           | S2, S3  | S2    |                                                                                            |
| CC19  | ST1416           | X                |    | X  |    |    |    |    |    |    |    |                                               | M4            | M4           |         |       | M1: Specific room, raw side                                                                |
|       | ST19             |                  |    |    |    |    |    |    |    |    |    | X                                             | S6            |              |         | S6    | Head cutter, packaging machine                                                             |
| CC37  | ST37             |                  |    |    |    |    |    |    |    |    |    | X                                             |               |              |         | S6    | Helix, Grader                                                                              |
| CC91  | ST91             | X                |    |    |    |    |    |    |    |    |    |                                               | M1            | M1           |         |       | M1: All from raw meat departments                                                          |
| CC121 | ST121            |                  |    | X  |    | X  |    |    |    |    |    | X                                             | M4, S6        | M4           | S6      | S6    | S6: Head cutter, scaleoff                                                                  |
| CC177 | ST177            |                  |    |    |    |    |    |    |    |    | X  |                                               |               |              | S5      |       | Grader                                                                                     |
| CC199 | ST199            |                  |    |    |    | X  |    |    |    |    |    |                                               |               |              |         |       | M8: Three isolates; drain, gate, product                                                   |
| CC315 | ST249            |                  |    |    |    |    |    |    |    |    |    | X                                             |               |              |         |       | Filleting machine, scaleoff                                                                |
| CC403 | ST403            |                  |    |    |    |    |    |    |    |    |    | X                                             |               |              | S6      | S6    | Freezing tray                                                                              |
| CC415 | ST394            | X                |    | X  |    |    |    |    |    |    |    |                                               | M1, M4        | M4           |         |       | M1: Raw meat department                                                                    |

965 <sup>a</sup> Included isolates comprise clones with ≤20 wgMLST allelic differences collected in at least two calendar  
966 years.

967 <sup>b</sup> Floors includes floor-related sites such as wheels, floor mats, shoes, or floor weights.

968 <sup>c</sup> Includes one ST2344 isolate.

969 Figure legends

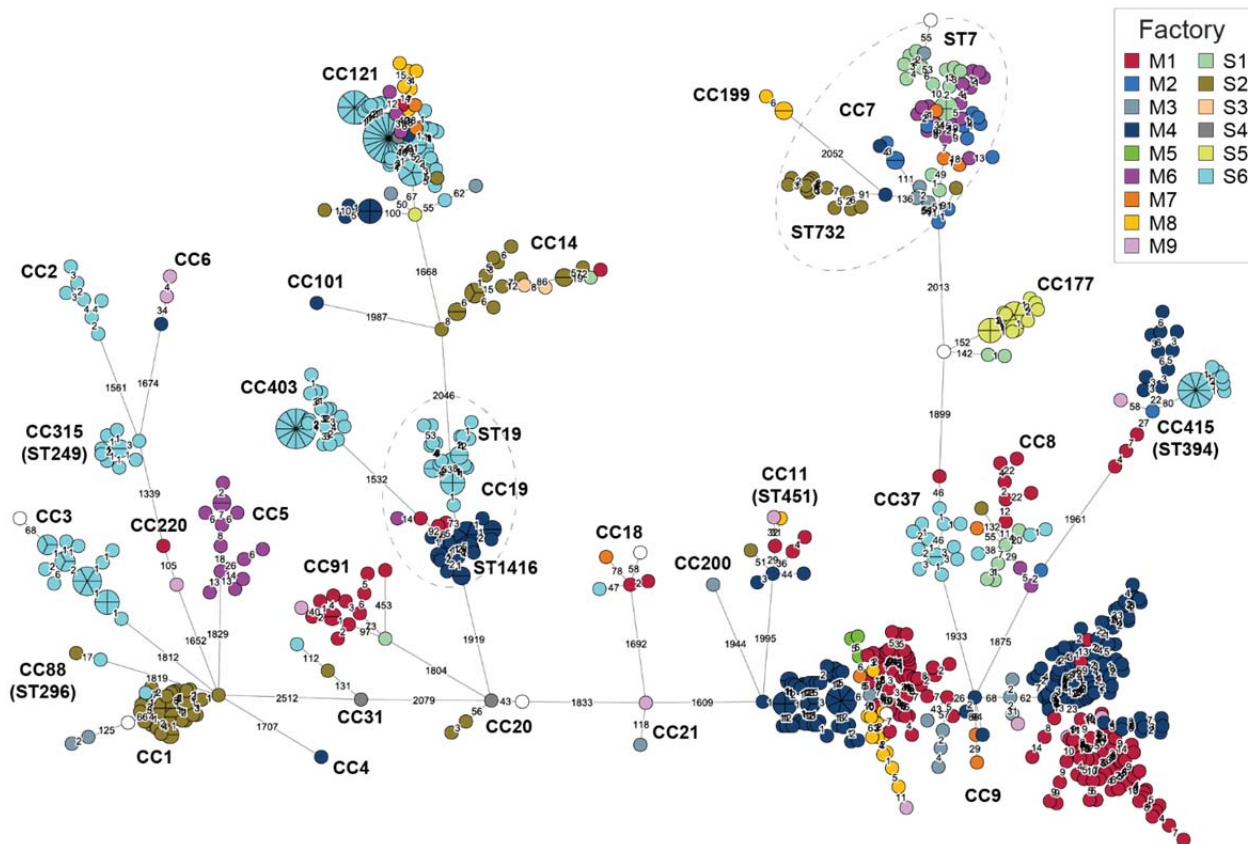

970  
971 **Figure 1:** Minimum spanning tree based on wgMLST analysis for the 769 *L. monocytogenes* from  
972 food processing environments. The area of each circle is proportional to the number of isolates  
973 represented, and the number of allelic differences between isolates is indicated on the edges  
974 connecting two nodes. The nodes are colored by factory of origin (meat production plants M1-  
975 M9; salmon processing plants S1-S6), and CCs and STs are indicated (the ST number is the same  
976 as the CC unless specified).

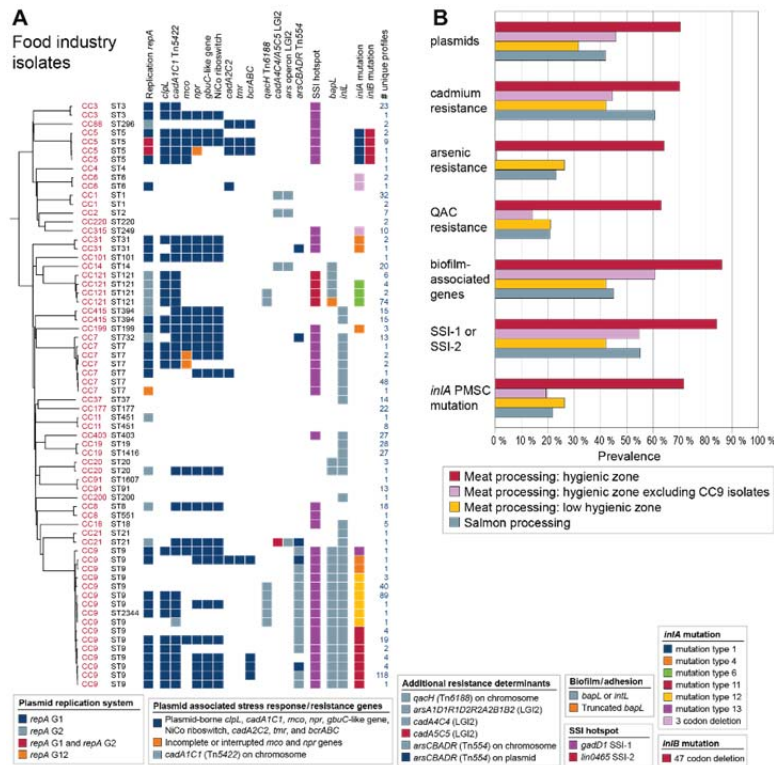

977

978 **Figure 2:** Presence of accessory genetic determinants associated with stress survival, resistance,  
 979 or persistence in *L. monocytogenes* from food processing environments. **A)** Unique  
 980 combinations of ST and the variable stress response loci in isolates from food processing  
 981 environments. All 769 isolates are shown individually in Fig. S1. The phylogeny is a midpoint-  
 982 rooted Neighbor-Joining tree based on wgMLST analysis and shows one arbitrarily selected  
 983 genome from each of the groups of genomes containing the same unique gene combination.  
 984 The number of genomes harboring the same unique combination is indicated in the right  
 985 column. **B)** Prevalence of genetic determinants in isolates from different sources. Cadmium  
 986 resistance; *cadA1C1*, *cadA2C2*, *cadA4A4* or *cadA5C5*, arsenic resistance;  
 987 *arsA1D1R1D2R2A2B1B2* on LG12 or *arsCBADR* on Tn554-like transposon, QAC resistance; *bcrABC*  
 988 or *qacH*, biofilm-associated genes; *bapL* and/or *inlL*. Statistical analysis for differences in  
 989 categories using Pearson's chi-squared test is presented in Table S5.

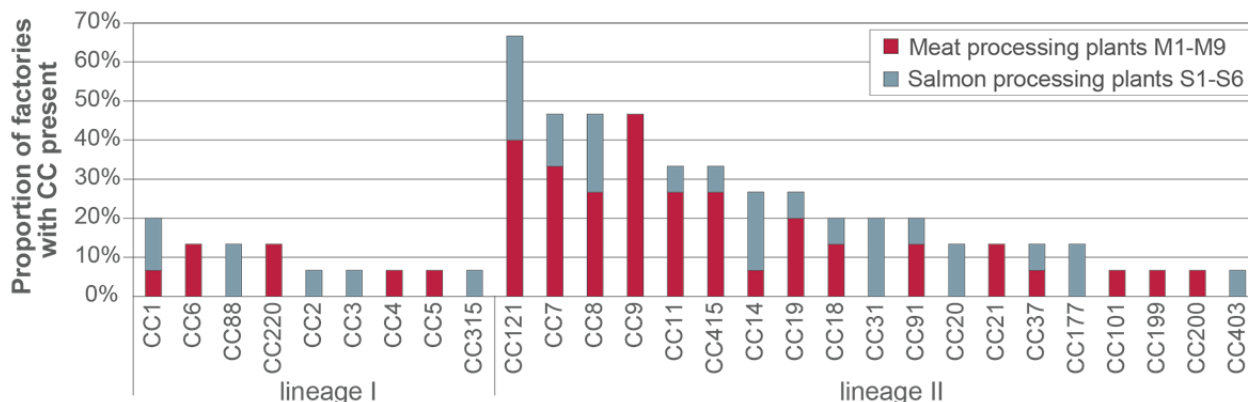

990  
991 **Figure 3:** Different CCs detected in varying proportions of factories. The data is presented as a  
992 stacked bar plot showing the percentage of examined meat and salmon processing plants in  
993 which each CC was detected. A total of 15 factories were included.

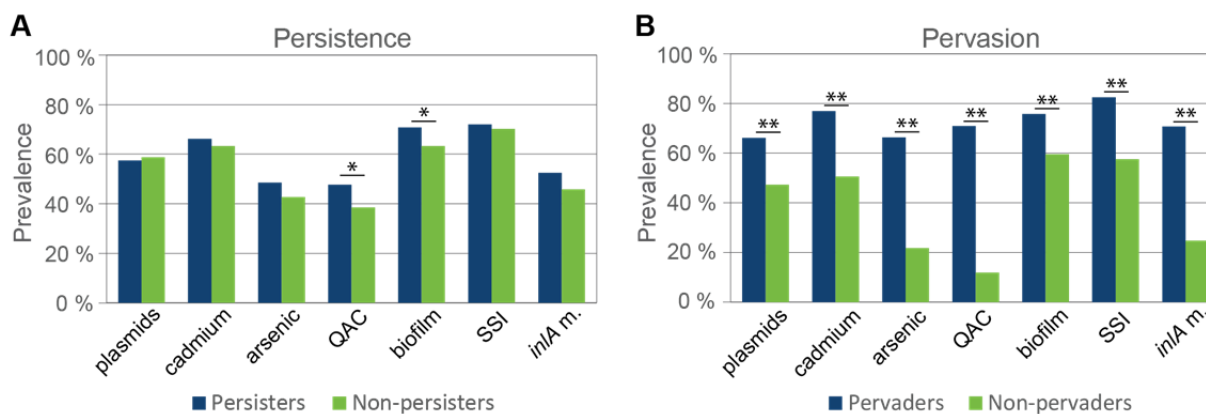

994  
995 **Figure 4:** Prevalence of subgroups of accessory genetic determinants associated with stress  
996 survival, resistance, and persistence in *L. monocytogenes* classified as **A)** persistent and/or **B)**  
997 pervasive. Cadmium; cadmium resistance loci *cadA1C1*, *cadA2C2*, *cadA4C4*, or *cadA5C5*, arsenic;  
998 arsenic resistance operons *arsA1D1R1D2R2A2B1B2* on LGI2 or *arsCBADR* on the Tn554-like  
999 transposon, QAC; QAC resistance loci *qacH* or *bcrABC*, biofilm; biofilm-associated genes *bapL*  
1000 and/or *inlL*, SSI; stress survival islets SSI-1 or SSI-2, and *inlA m.*; PMSC mutation in the *inlA* gene.  
1001 Asterisks represent significant differences (Pearson's chi-squared test. \*,  $p < 0.05$ ; \*\*,  $p < 0.001$ ,  
1002 see also Table S6).

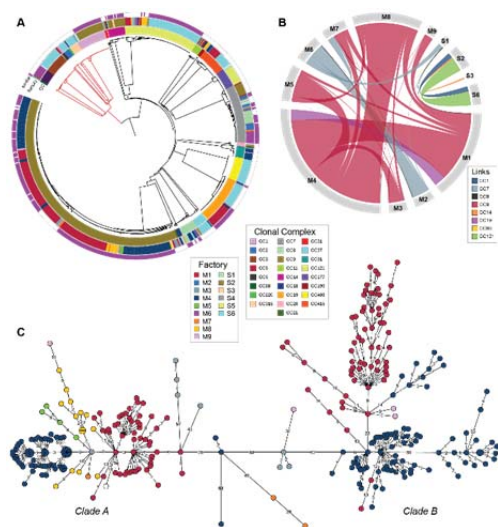

1003

1004 **Figure 5:** Pervasive strains, present in more than one processing plant. **A)** Neighbor-Joining  
1005 phylogenetic tree based on wgMLST analysis, showing CC (inner ring), factory of origin (middle  
1006 ring), and isolates for which genetically similar isolates ( $\leq 20$  wgMLST allelic differences) were  
1007 found in at least one other factory (outer ring). Red branches are lineage I, black branches  
1008 lineage II. **B)** The genetic associations between isolates from different factories illustrated by a  
1009 chord diagram. The outer sectors represent the factories for which genetically similar isolates  
1010 ( $\leq 20$  wgMLST allelic differences) were found in at least one other factory, and the links between  
1011 the factories represent the pairs of genetically similar isolates, colored by CC group. The  
1012 thickness of each arc represents the sum of the similarity scores for each pair of isolates found  
1013 in the two factories, weighted by their similarity. **C)** Minimum spanning tree showing the  
1014 relationship between the 290 CC9 isolates. Nodes are colored by factory of origin (same colors  
1015 as in **A**; the white-colored isolate is from a domestic kitchen). The area of each node is  
1016 proportional to the number of isolates represented, and the number of allelic differences  
1017 between isolates is indicated on the branches connecting two nodes. Branch lengths are square  
1018 root scaled.

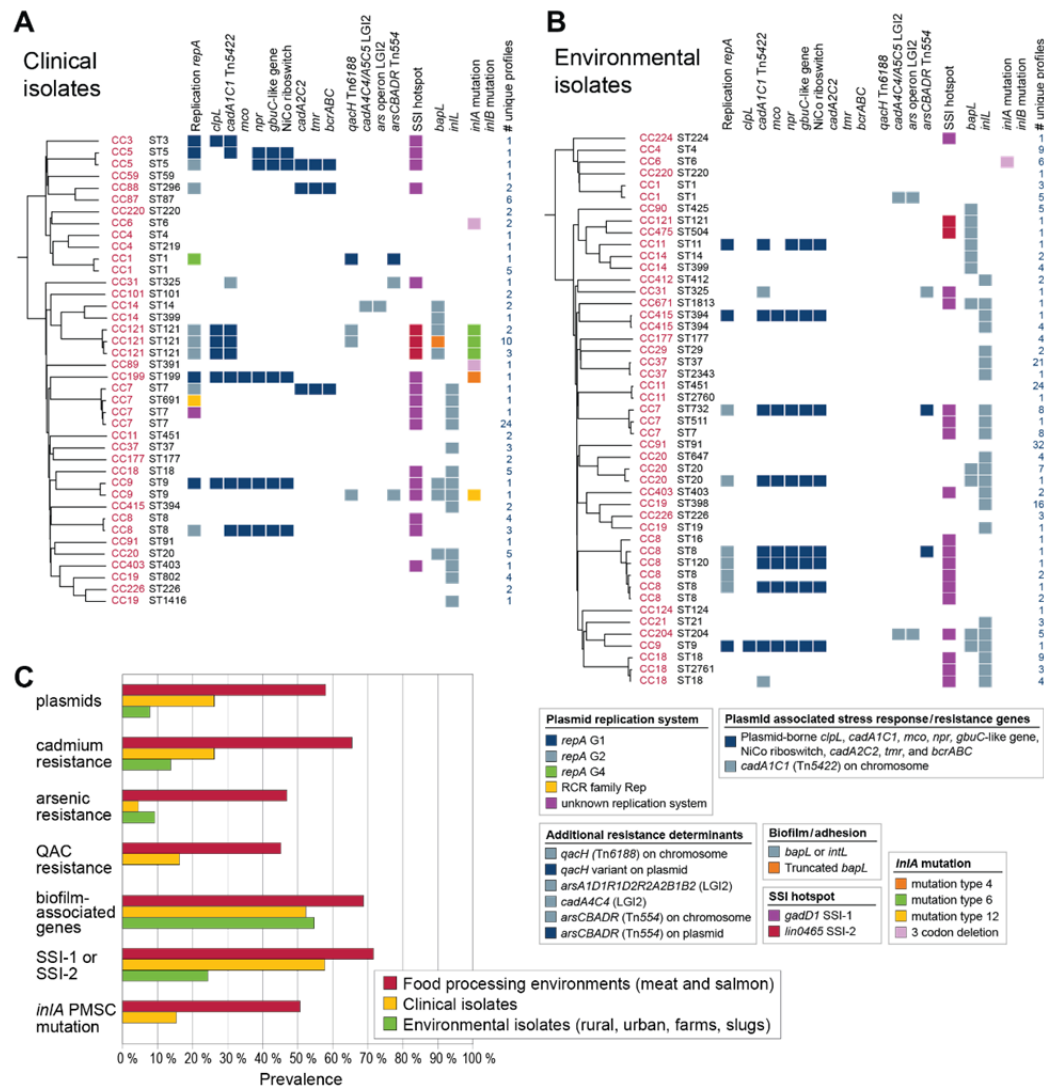

1019

1020 **Figure 6:** Presence of accessory genetic determinants associated with stress survival, resistance,

1021 or persistence in *L. monocytogenes* from different sources. **A)** Norwegian clinical isolates 2010-

1022 2015 (56), and **B)** isolates from natural (rural/urban/farm/slug) environments in Norway (2). For

1023 each ST, one arbitrarily selected genome from each of the groups of genomes containing the

1024 same unique combination of stress response loci is shown. **C)** Prevalence of genetic

1025 determinants in isolates from different sources. See legend to Fig. 2 for details on categories.

1026 Statistical analysis for differences in categories using Pearson's chi-squared test is presented in

1027 Table S7.

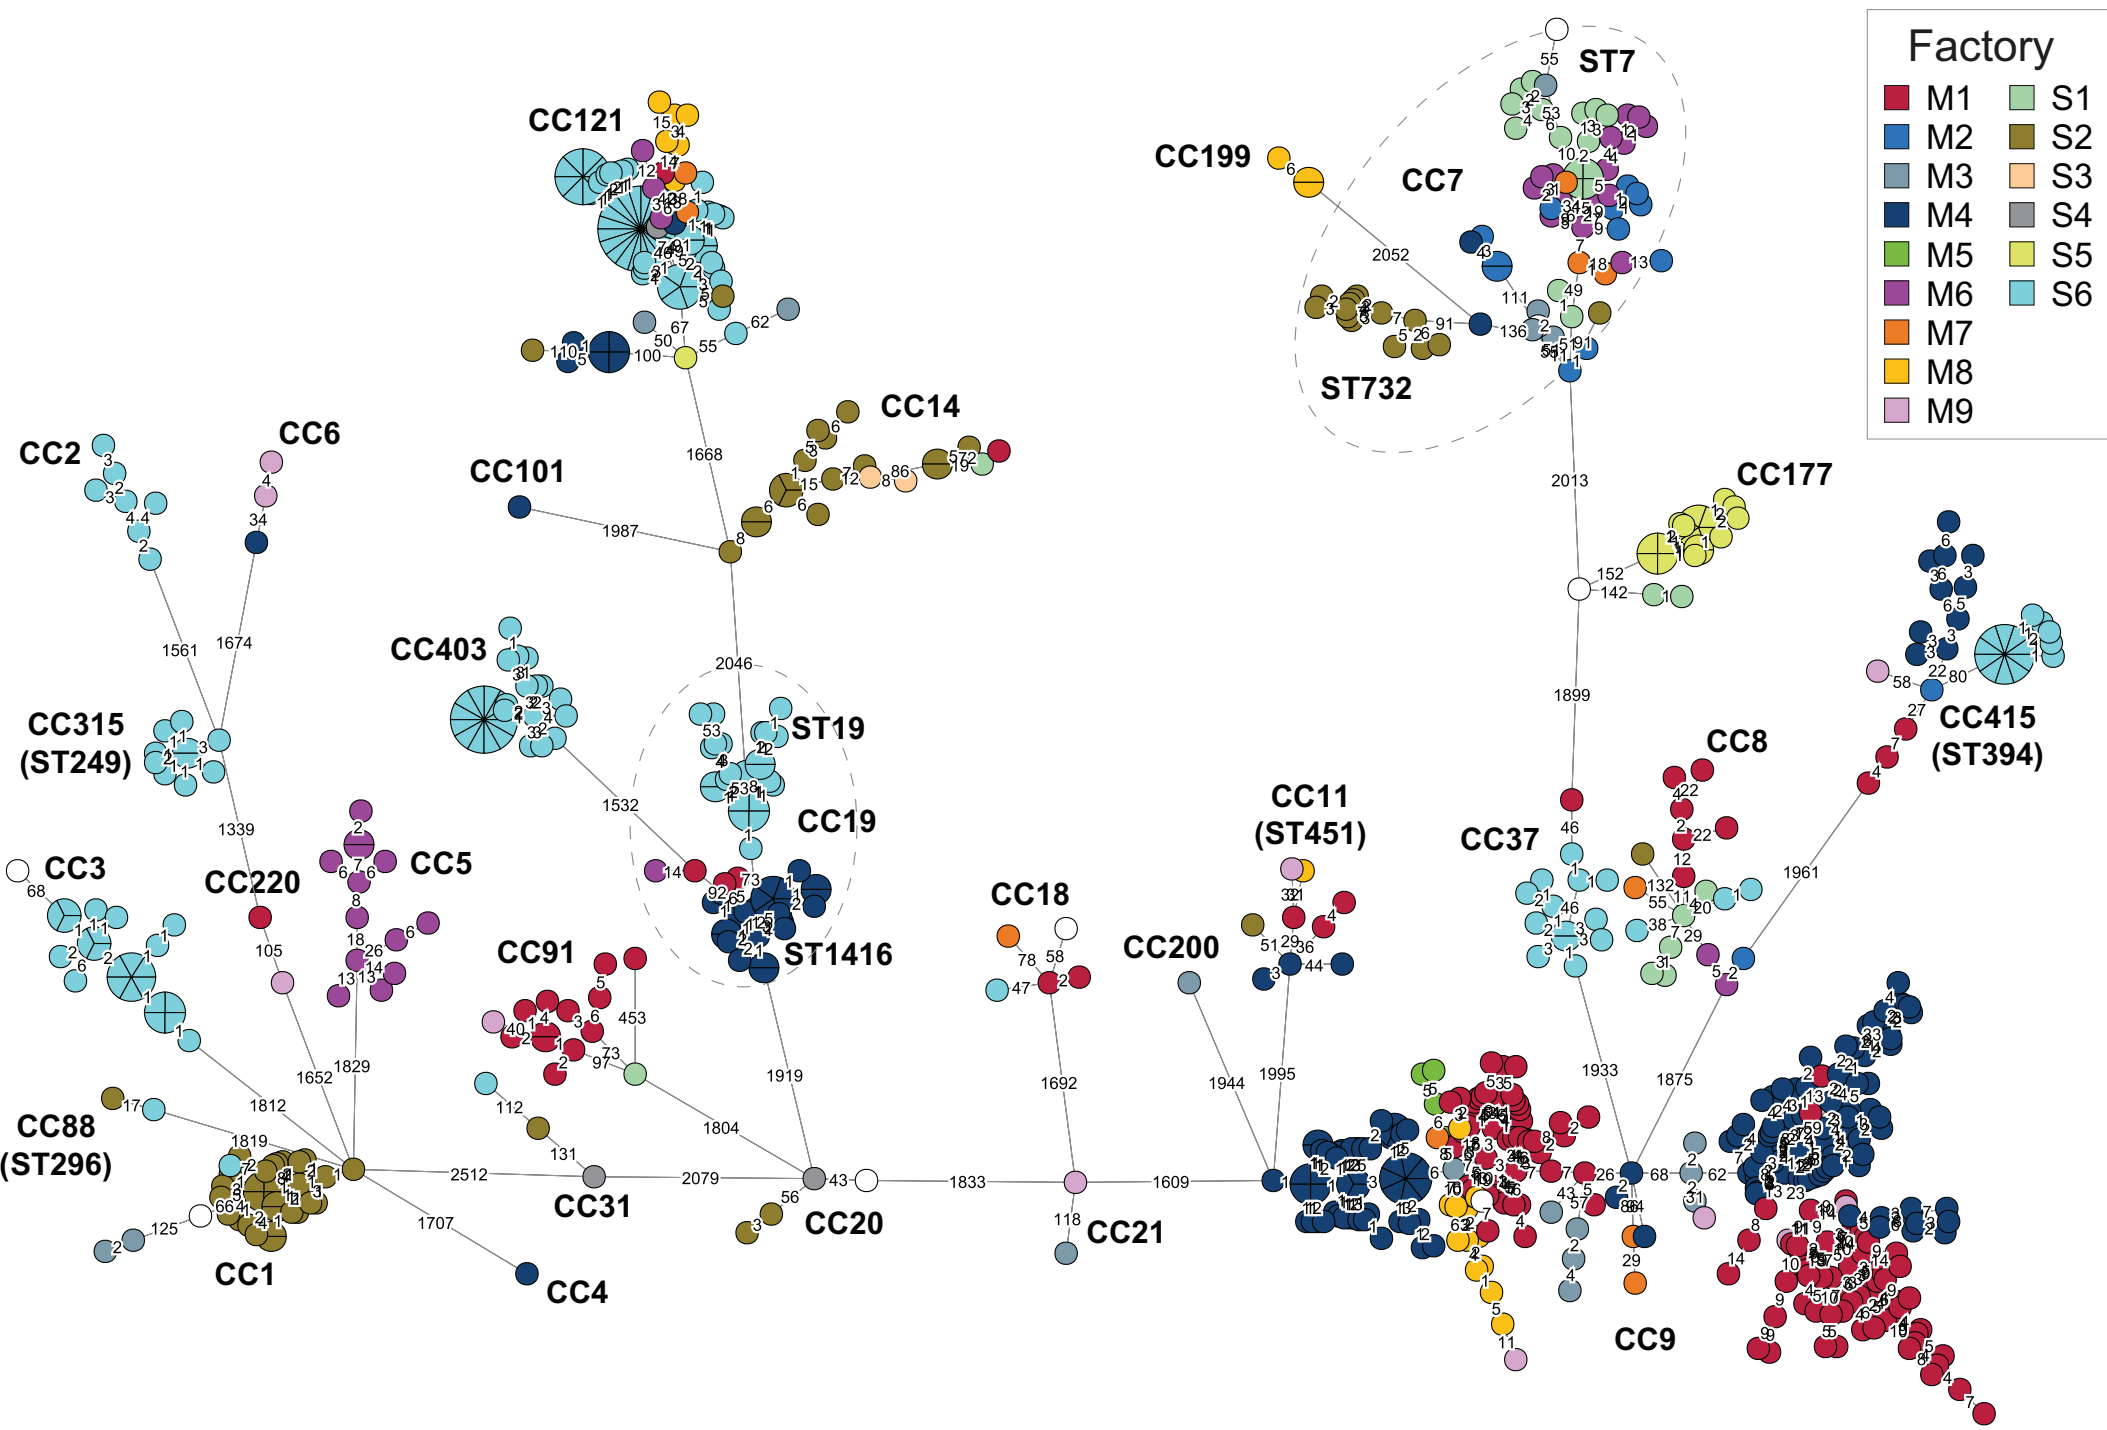



# A

## Food industry isolates

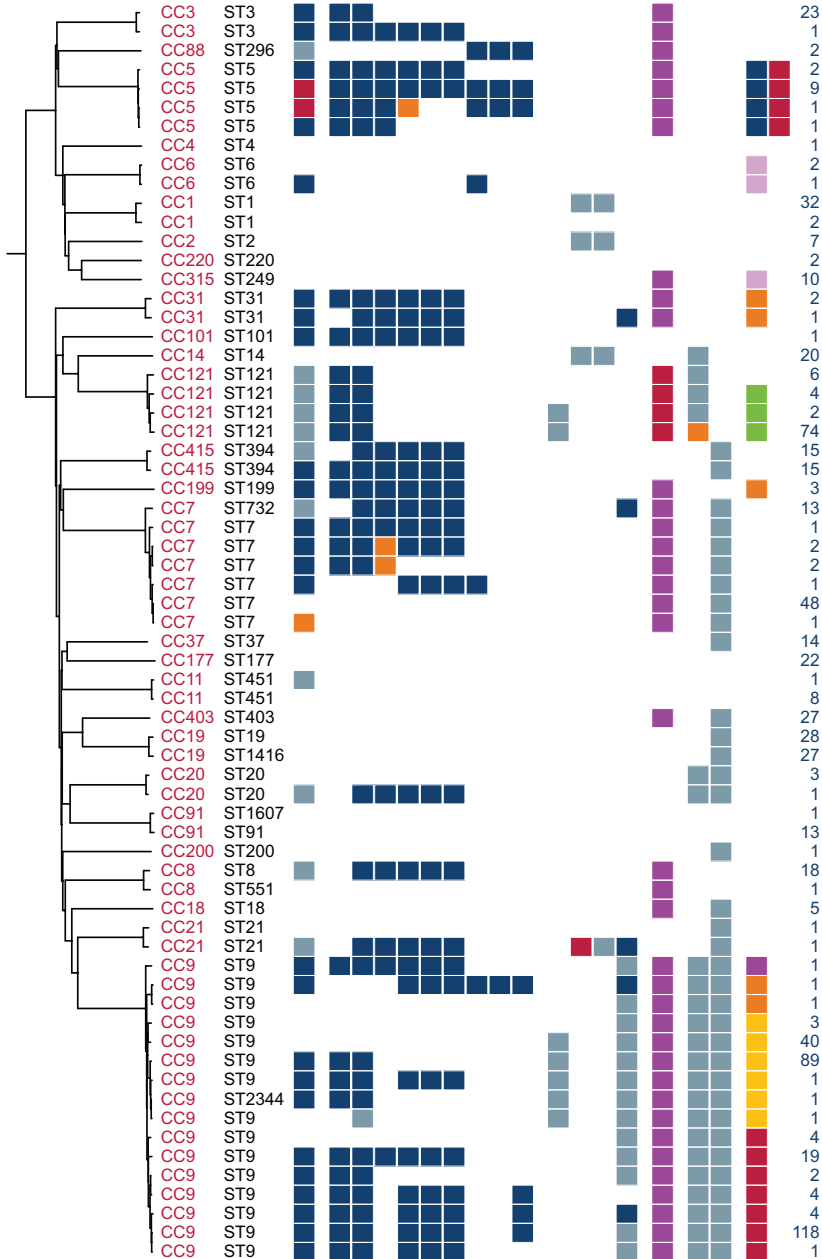

### Plasmid replication system

- repA G1
- repA G2
- repA G1 and repA G2
- repA G12

### Plasmid associated stress response/resistance genes

- Plasmid-borne *clpL*, *cadA1C1*, *mco*, *npr*, *gbuC*-like gene, NiCo riboswitch, *cadA2C2*, *tmr*, and *bcrABC*
- Incomplete or interrupted *mco* and *npr* genes
- *cadA1C1* (Tn5422) on chromosome

### Additional resistance determinants

- *qacH* (Tn6188) on chromosome
- *arsA1D1R1D2R2A2B1B2* (LG12)
- *cadA4C4* (LG12)
- *cadA5C5* (LG12)
- *arsCBADR* (Tn554) on chromosome
- *arsCBADR* (Tn554) on plasmid

### Biofilm/adhesion

- *bapL* or *inI*
- Truncated *bapL*

### SSI hotspot

- *gadD1* SSI-1
- *lin0465* SSI-2

### inIA mutation

- mutation type 1
- mutation type 4
- mutation type 6
- mutation type 11
- mutation type 12
- mutation type 13
- 3 codon deletion

### inIB mutation

- 47 codon deletion

# B

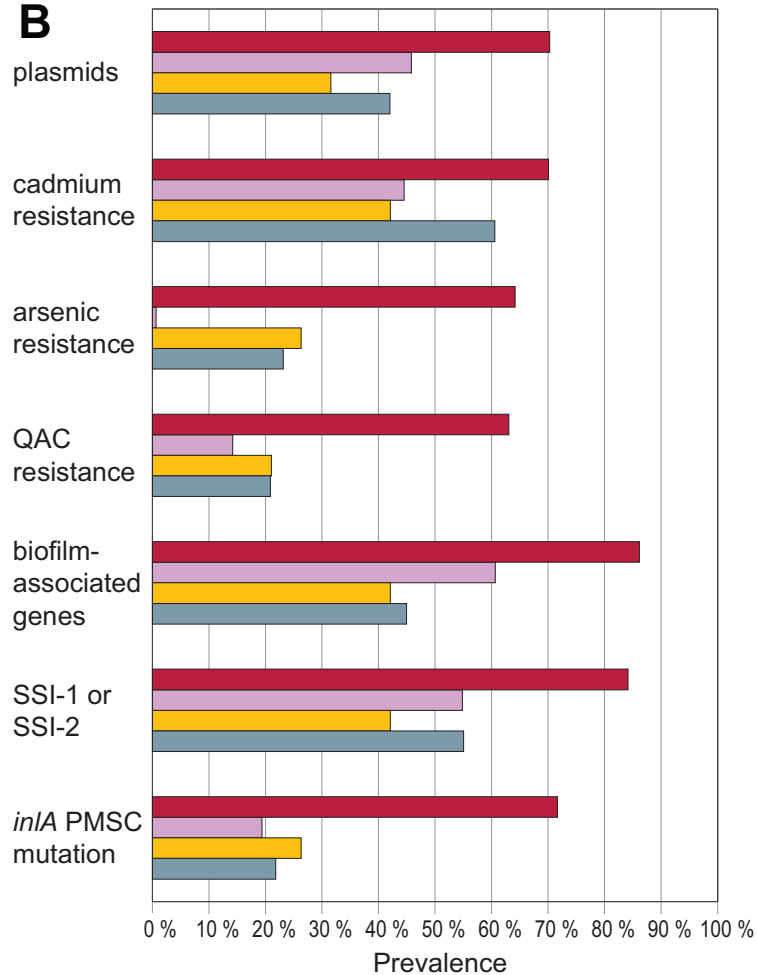

- Meat processing: hygienic zone
- Meat processing: hygienic zone excluding CC9 isolates
- Meat processing: low hygienic zone
- Salmon processing

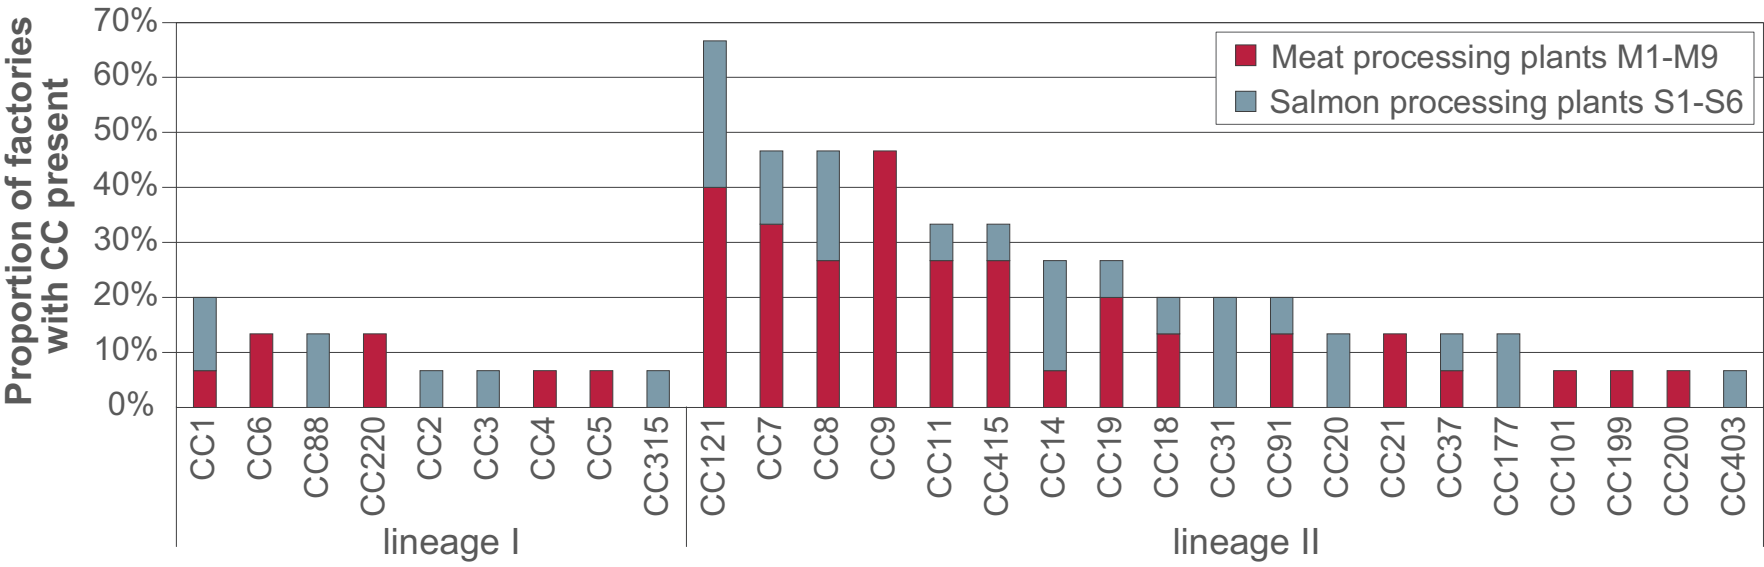

**A**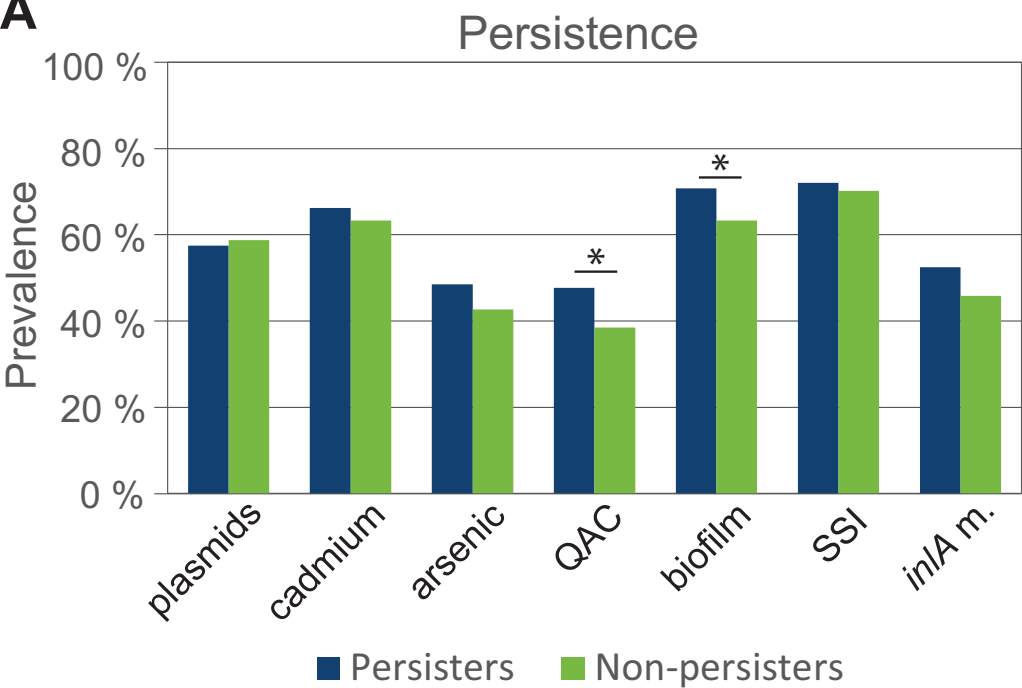**B**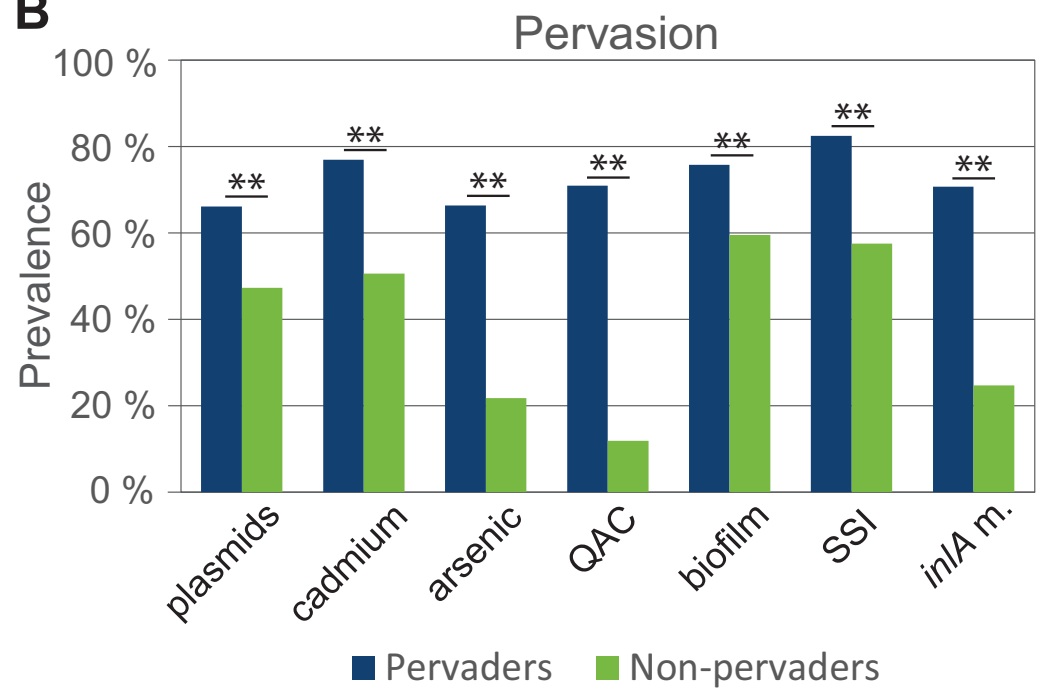

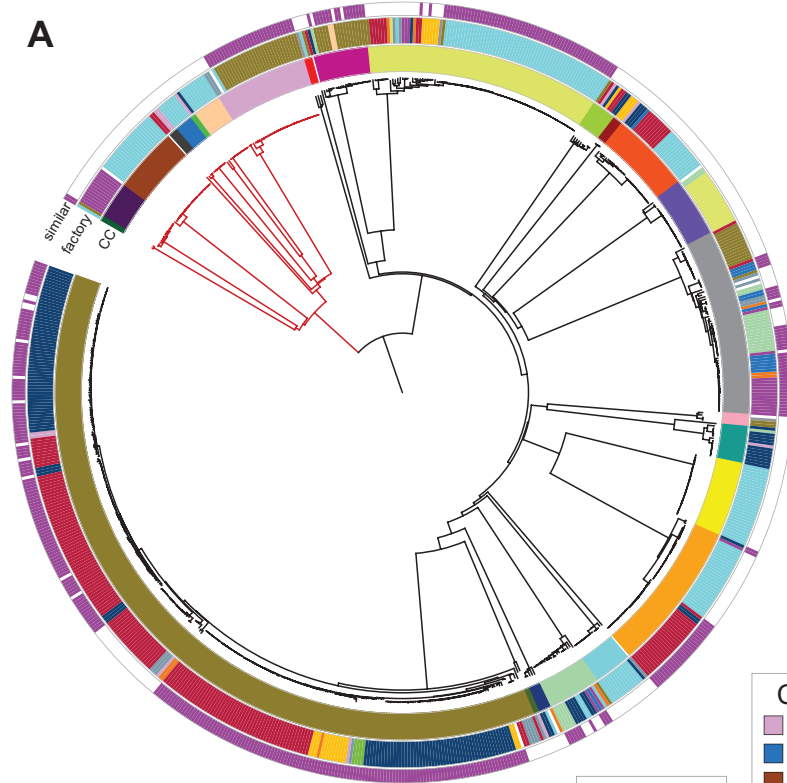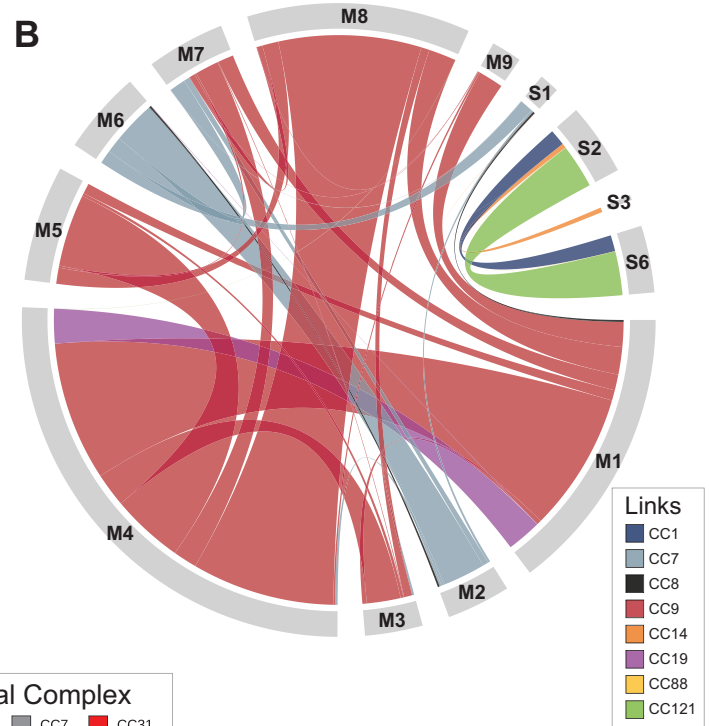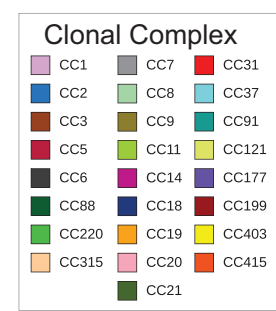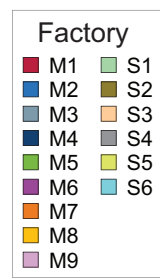

Tree scale: 0.1

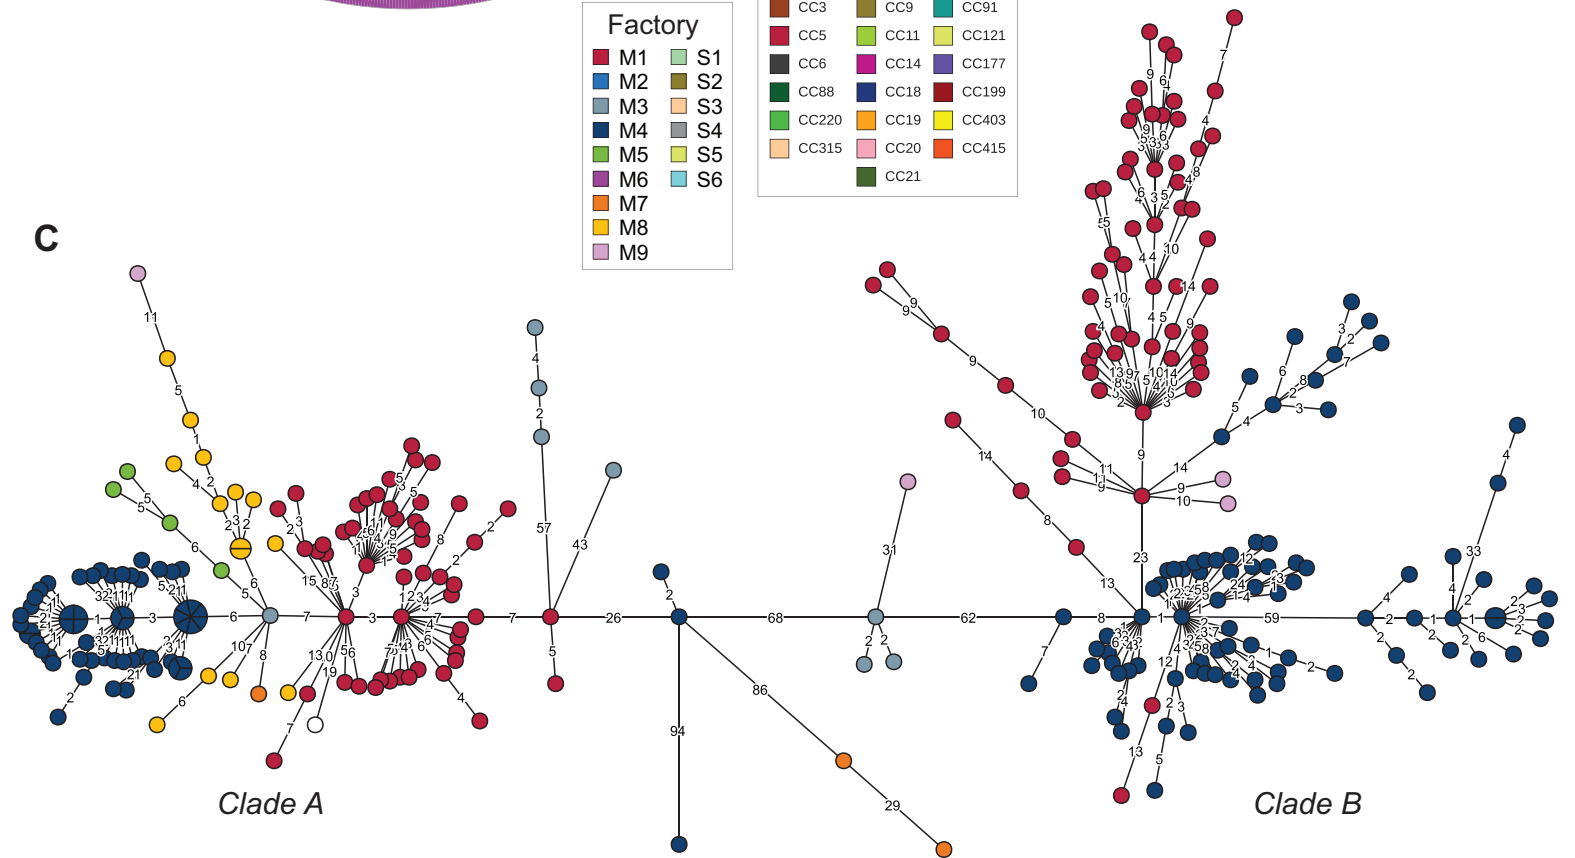

**A**

**Clinical isolates**

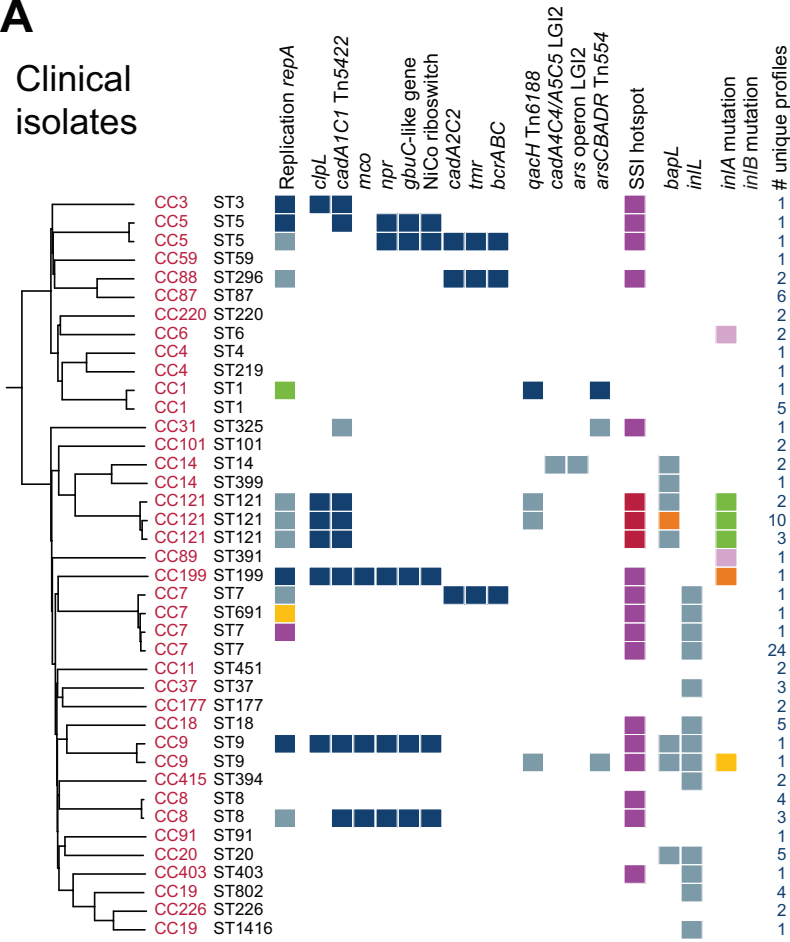

**B**

**Environmental isolates**

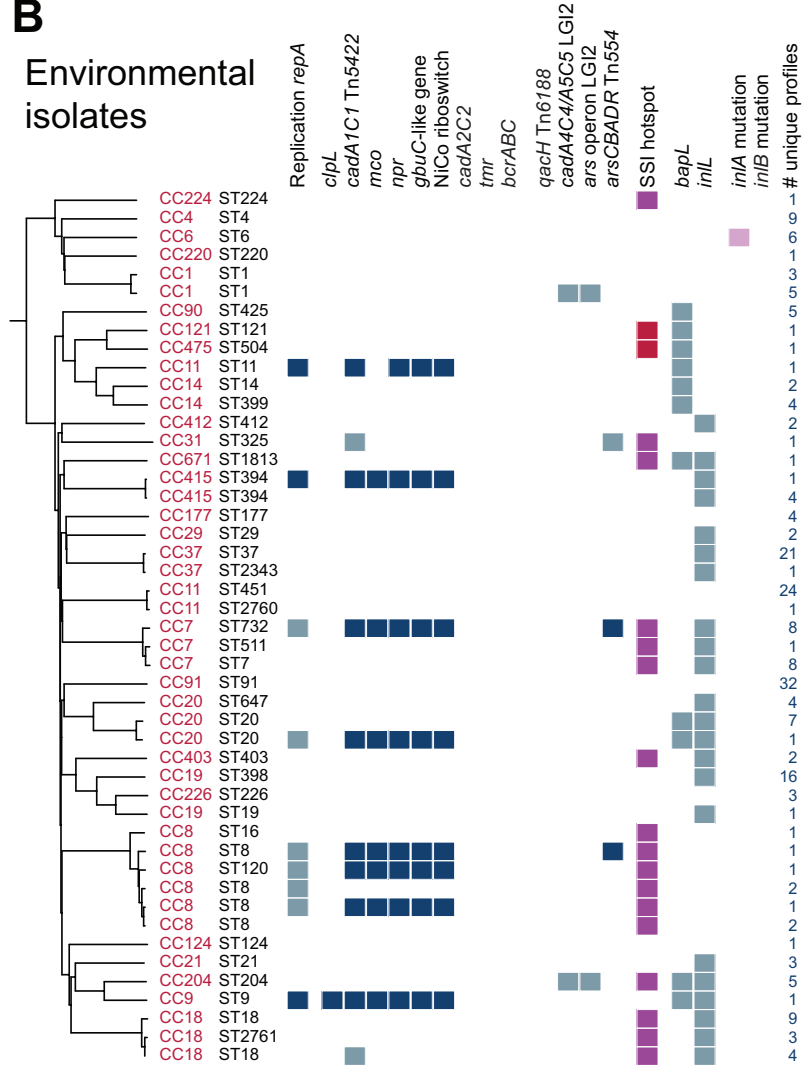

**C**

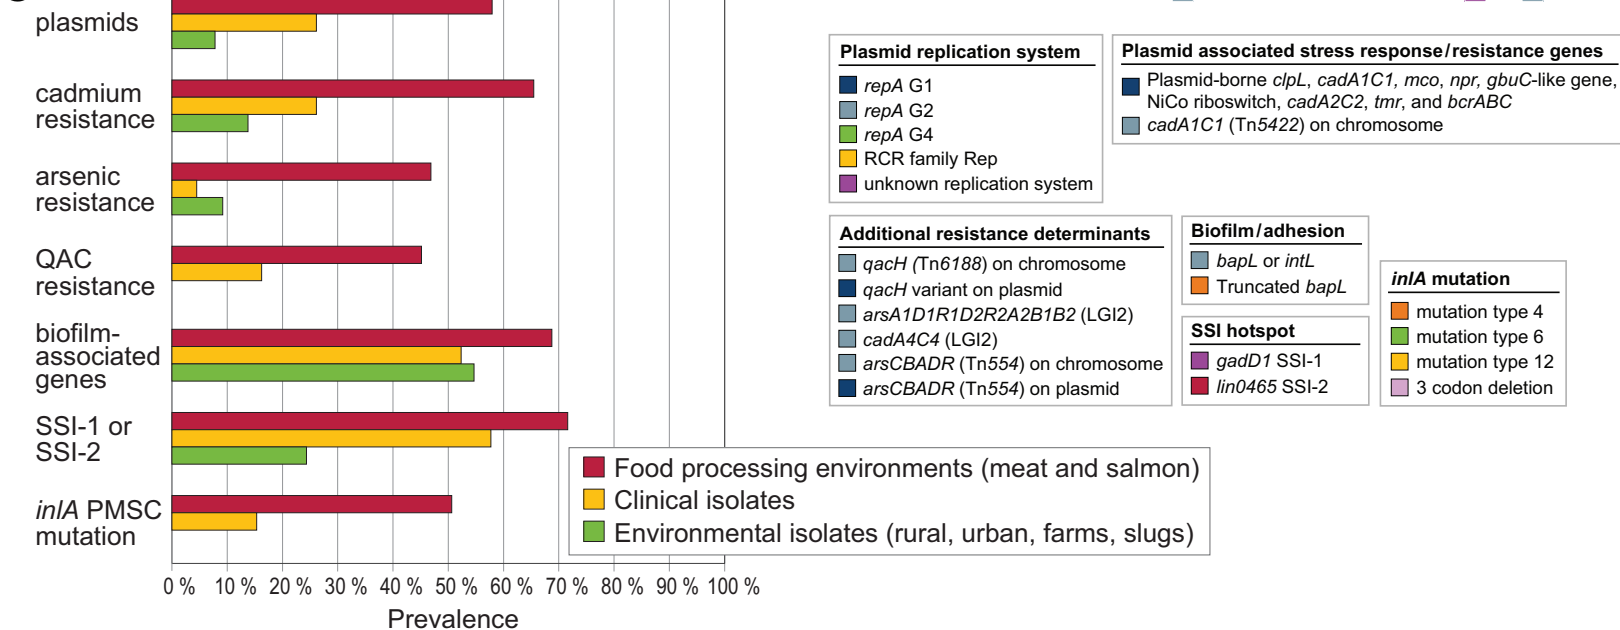

Source: http://biorxiv.org/content/10.1101/2022.05.25.493524v1.full.pdf
